# Supplementary material for: Antileishmanial potential of thiourea-based derivatives: design, synthesis and biological activity
Source: PubMed Central journal article supplement — RSC Adv. 2024 Nov 19;14(50):37131–41. doi: 10.1039/d4ra04965a (PMC11575720; doi:10.1039/d4ra04965a), 2024-11-19
Supplement: RA-014-D4RA04965A-s001.pdf [file RA-014-D4RA04965A-s001.pdf]

## **Antileishmanial potential of Thiourea-based derivatives: Design, synthesis and biological activity**

Abdul Hadi <sup>a, b, c</sup>, Muhammad Yaqoob <sup>d</sup>, Fahad Hussain <sup>d</sup>, Yasser MSA

Alkahraman <sup>\*a</sup>, Muhammad Saeed Jan<sup>e</sup>, Abid Mahmood <sup>f</sup>, Thomas Shier <sup>g</sup>,

Umer Rashid<sup>\*\*d</sup>

<sup>a</sup>Department of Pharmacy, COMSATS University Islamabad, Abbottabad Campus 22060  
KPK, Pakistan.

<sup>b</sup>Faculty of Pharmacy and Health Sciences, University of Balochistan Quetta 08770,  
Pakistan

<sup>c</sup>Department of Medicinal Chemistry, University of Minnesota, Minneapolis, USA

<sup>d</sup>Department of Chemistry, COMSATS University Islamabad, Abbottabad Campus 22060  
KPK, Pakistan.

<sup>e</sup>Department of Pharmacy, Bacha Khan University, 24420, Charsadda, KPK, Pakistan

<sup>f</sup>Department of Pharmaceutical Chemistry, Government College University Faisalabad,  
Pakistan

\*Corresponding authors: yasser@cuiatd.edu.pk

(Department of Pharmacy, COMSATS University Islamabad, 22060 Abbottabad, Pakistan)

\*Corresponding authors: umerrashid@cuiatd.edu.pk

(Department of Chemistry, COMSATS University Islamabad, 22060 Abbottabad, Pakistan)

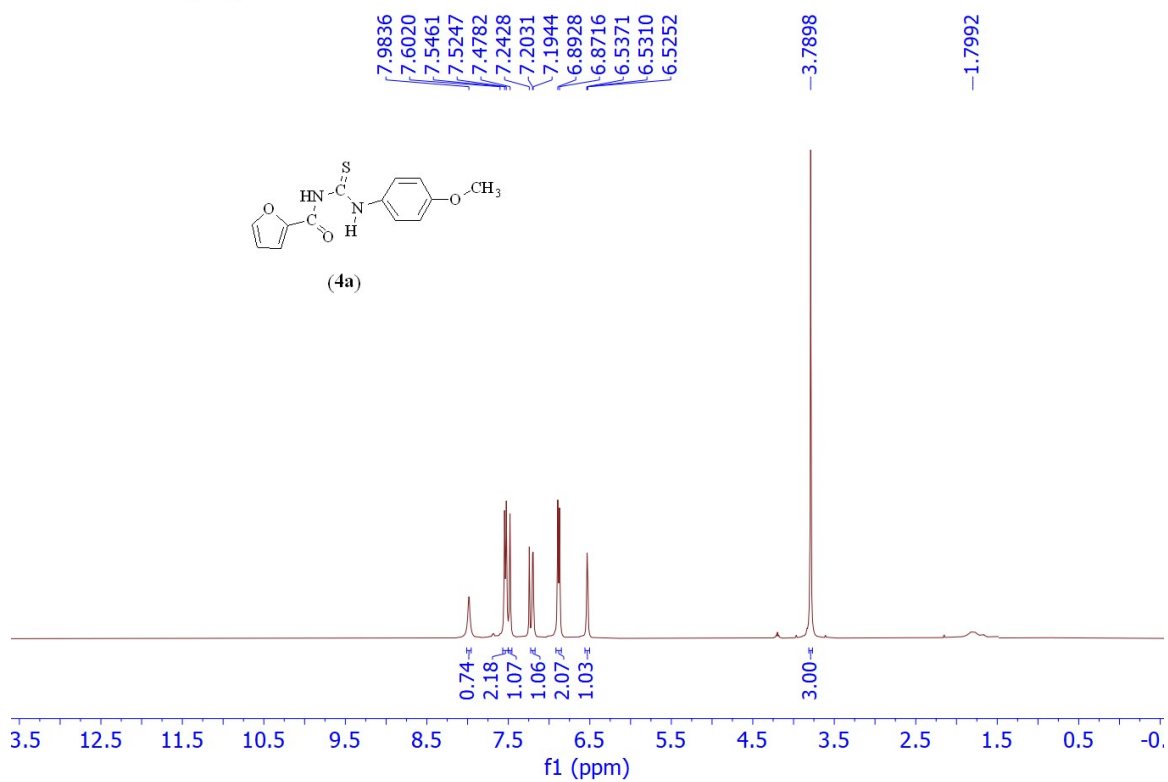

Figure S-1: <sup>1</sup>H NMR (400 MHz) spectrum of compound **4a** in CDCl<sub>3</sub>

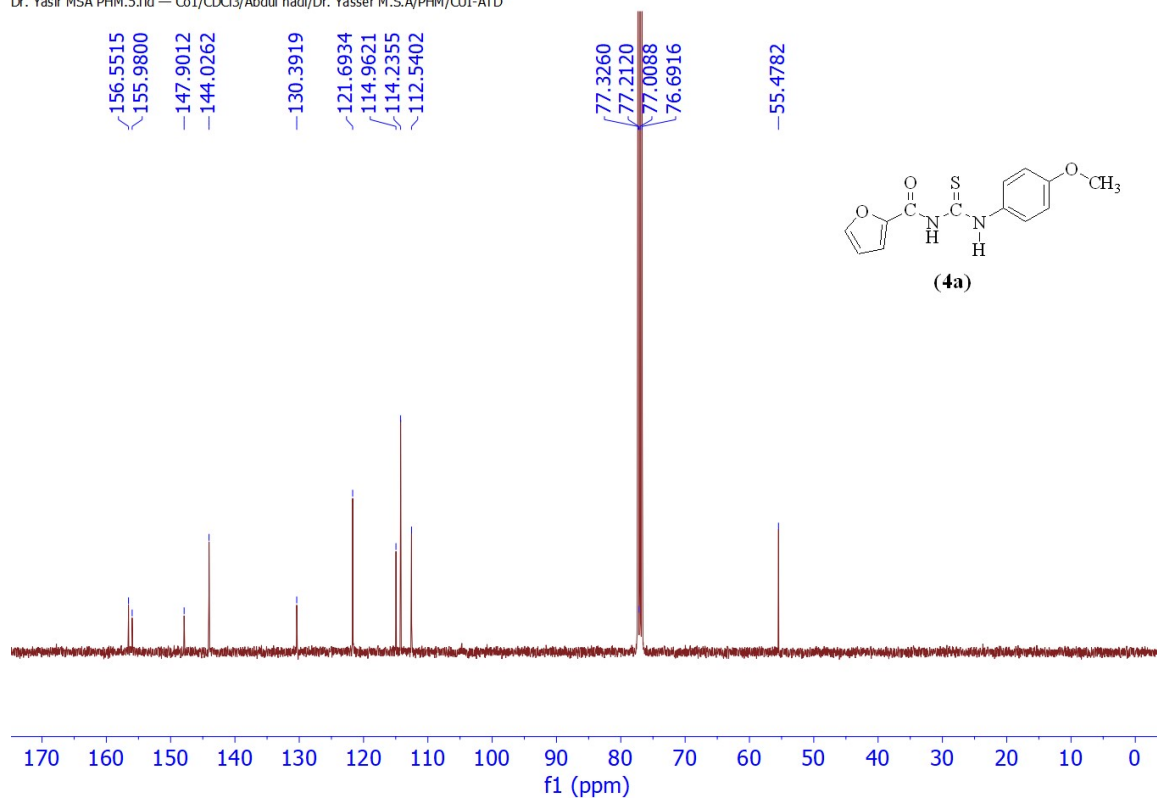

Figure S-2:  $^{13}\text{C}$  NMR (100 MHz) spectrum of compound **4a** in  $\text{CDCl}_3$

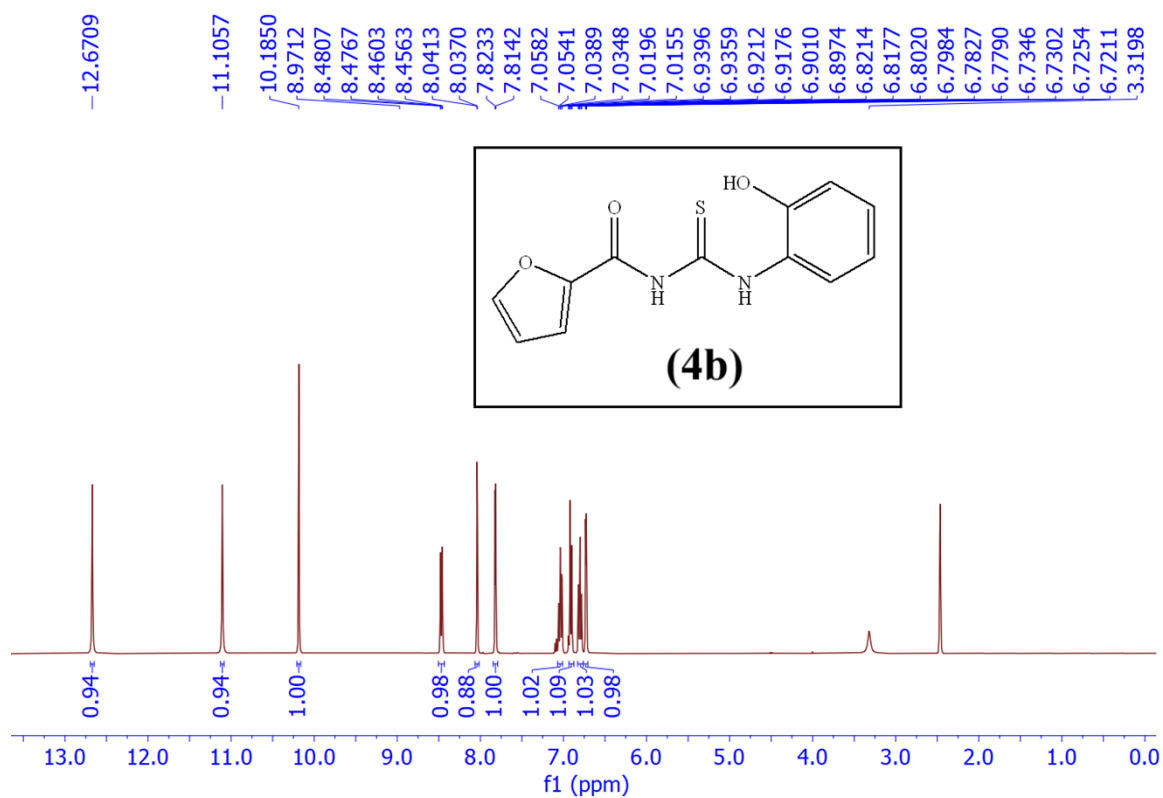

Figure S-3: <sup>1</sup>H NMR (400 MHz) spectrum of compound **4b** in CDCl<sub>3</sub>

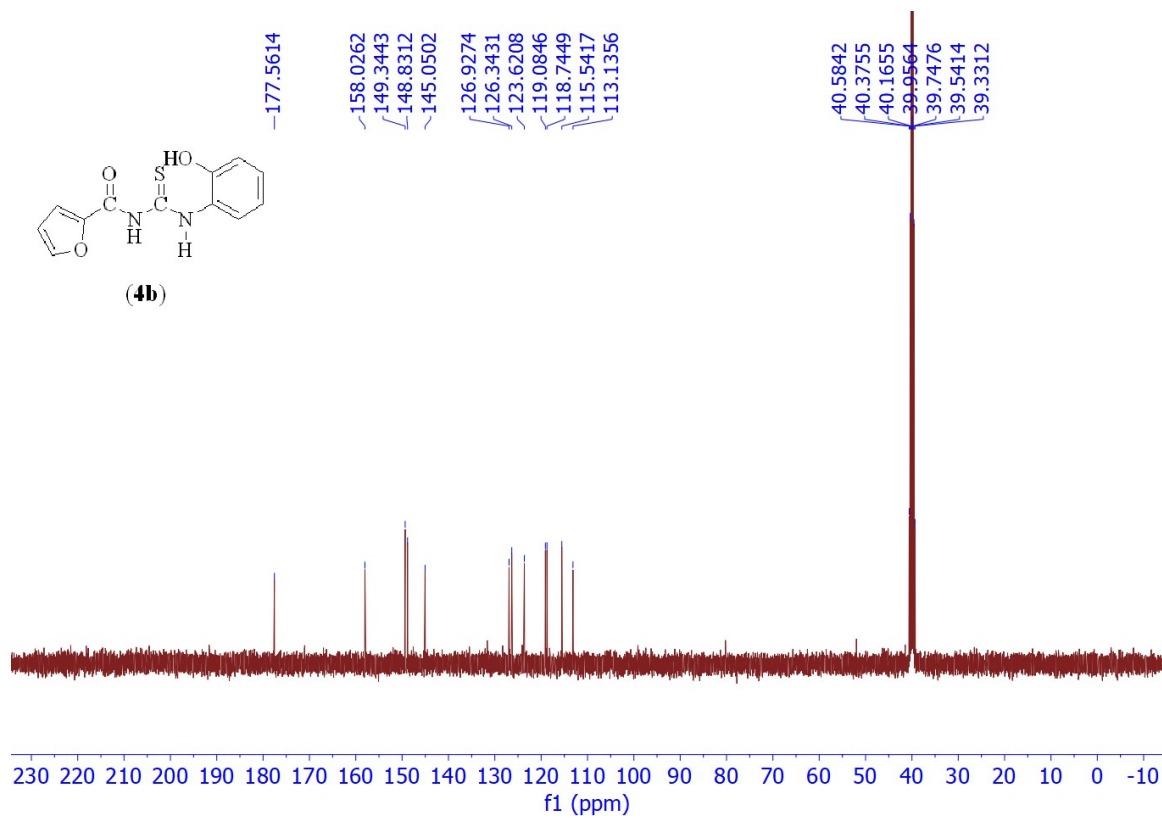

Figure S-4: <sup>13</sup>C NMR (100 MHz) spectrum of compound **4b** in DMSO-*d*<sub>6</sub>

## Display Report

|               |                                                     |                  |                      |
|---------------|-----------------------------------------------------|------------------|----------------------|
| Analysis Info |                                                     | Acquisition Date | 2/26/2024 1:55:46 PM |
| Analysis Name | \\DESKTOP-4FC8JBH\esi_data\abdhad\131197\3-N6FULL\1 |                  |                      |
| Method        | positive_03102022.tofpar                            | Operator         | operator name        |
| Sample Name   | 3-N6FULL                                            | Instrument       | BioTOF II            |
| Comment       | F3-PEG-3000Free format commentsFree format comments |                  |                      |

|                       |         |     |     |         |        |
|-----------------------|---------|-----|-----|---------|--------|
| Acquisition Parameter |         |     |     |         |        |
| n/a                   | n/a     | n/a | n/a | detbias | 1750 V |
| EndP                  | -4000 V | n/a | n/a | n/a     | n/a    |

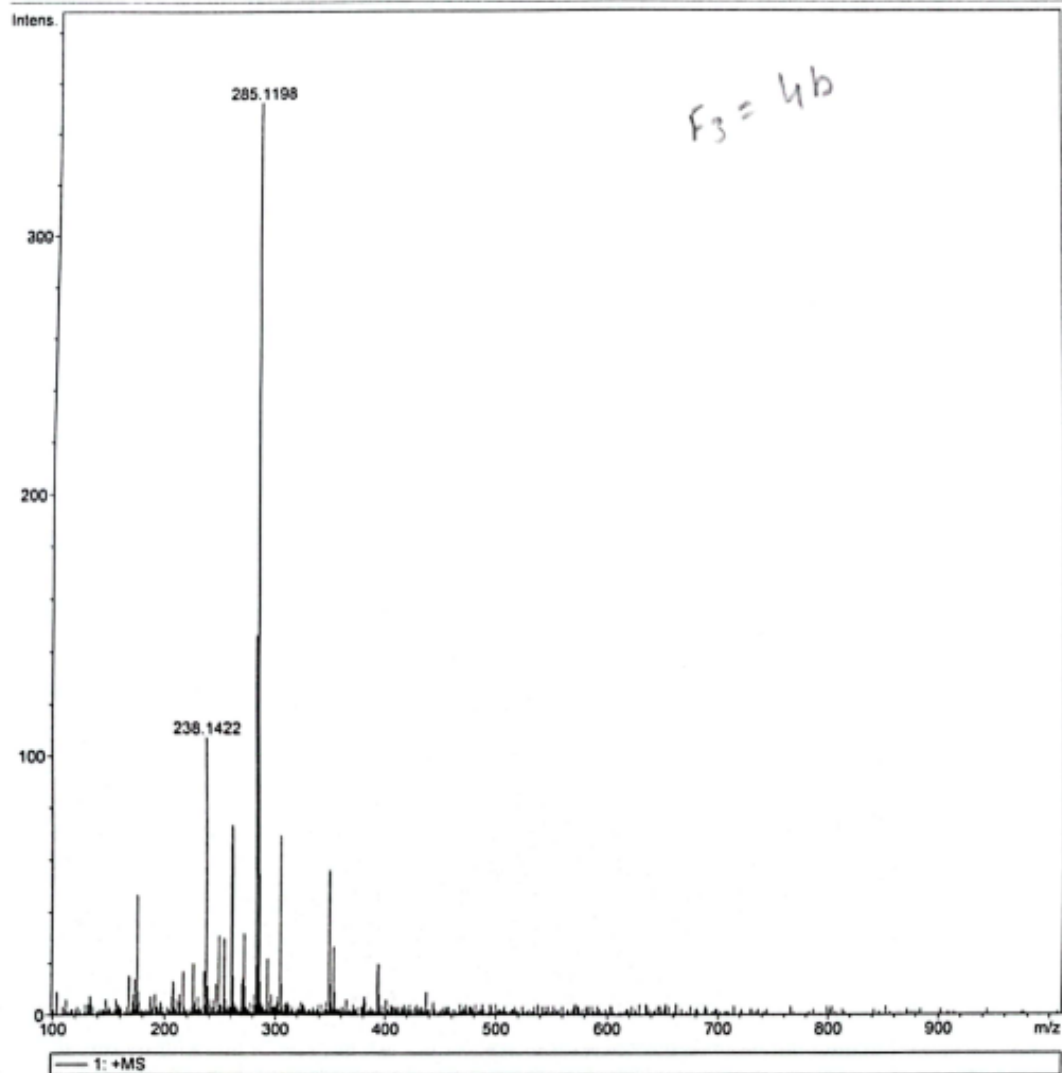

Figure S-5: HRMS of compound **4b**

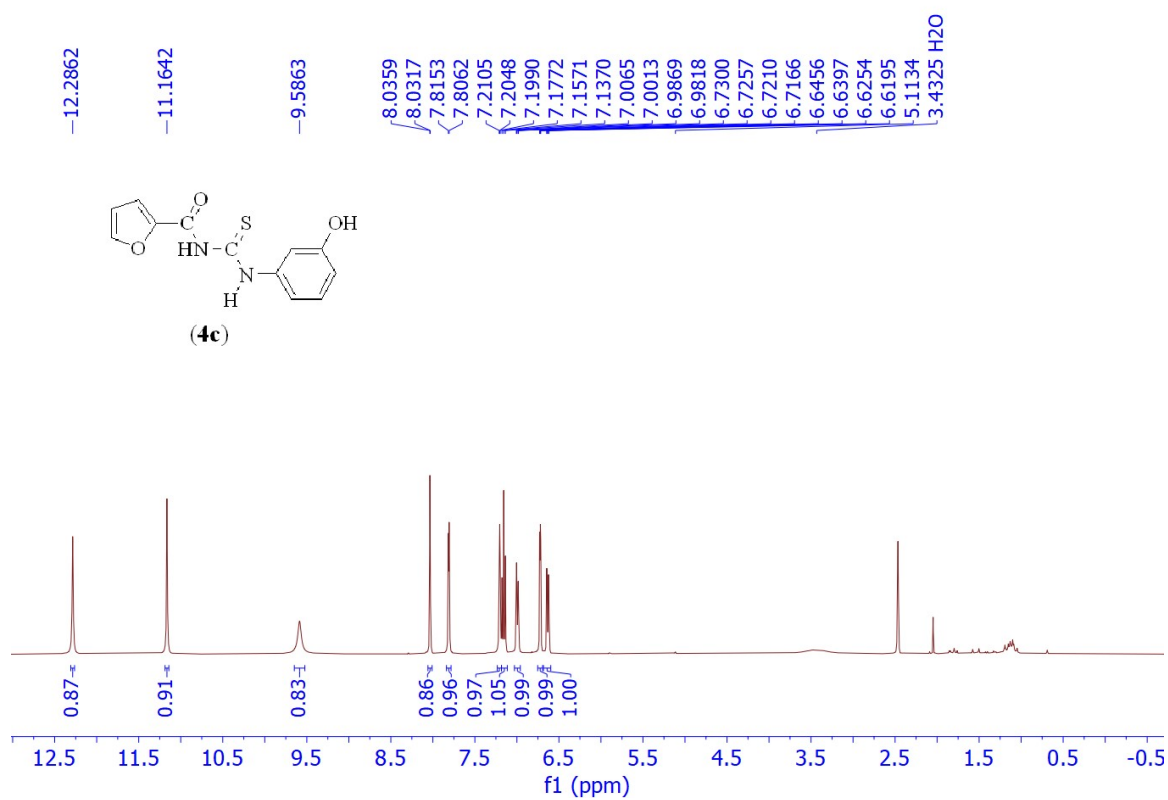

Figure S-6: <sup>1</sup>H NMR (400 MHz) spectrum of compound **4c** in DMSO-*d*<sub>6</sub>

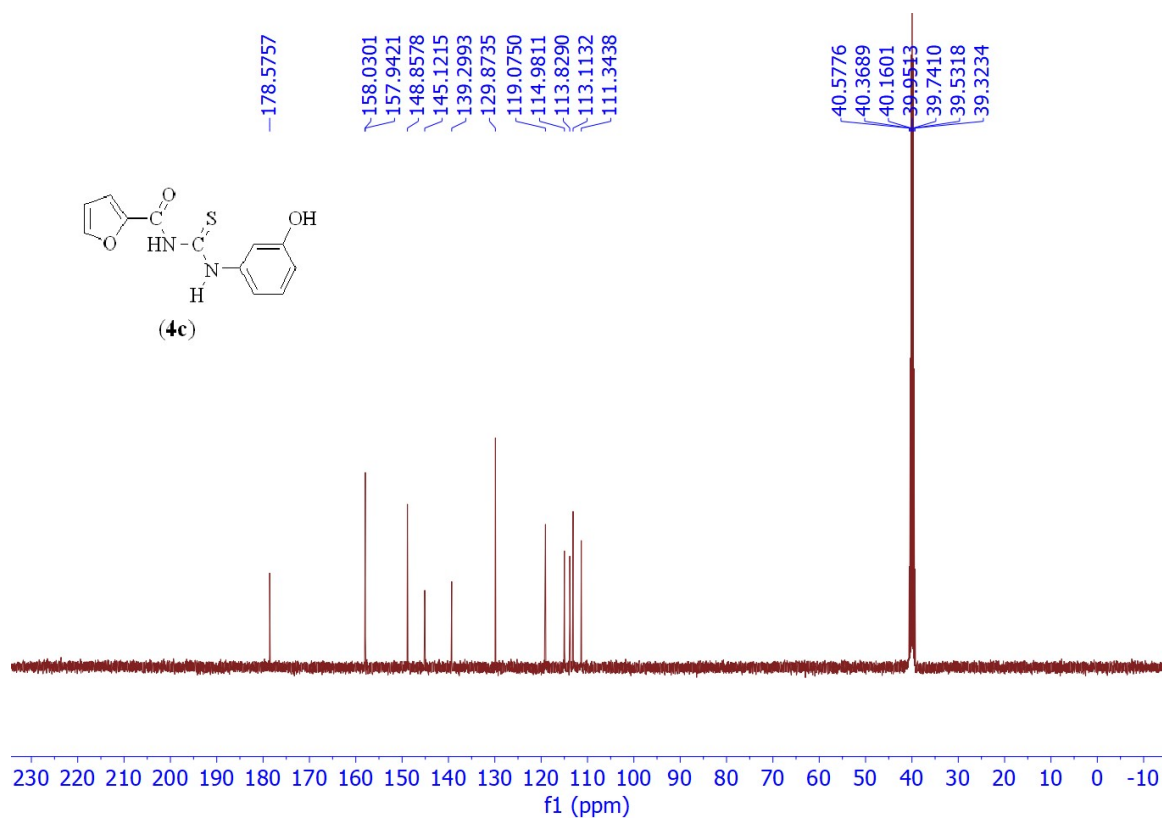

Figure S-7: <sup>13</sup>C NMR (100 MHz) spectrum of compound **4c** in DMSO-*d*<sub>6</sub>

## Mass Spectrum Report

### Analysis Info

Analysis Name: \\DESKTOP-4FC8J8H\\esi\_data\\abdhad\\1311193\\F5-3\\2240226\_MDE12\_90  
Method: positive\_03102022.tofpar  
Sample Name: F5-3  
Comment: 1000-Dilute nopegFree format commentsFree format comments

Acquisition Date: 2/26/2024 1:34:33 PM

Operator: operator name  
Instrument / Ser#: BioTOF II 1.11

### Full Mass Spectrum

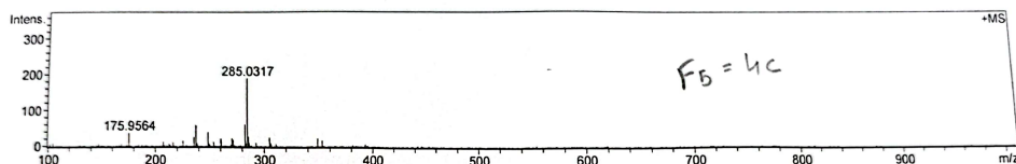

### Spectrum Region of Interest

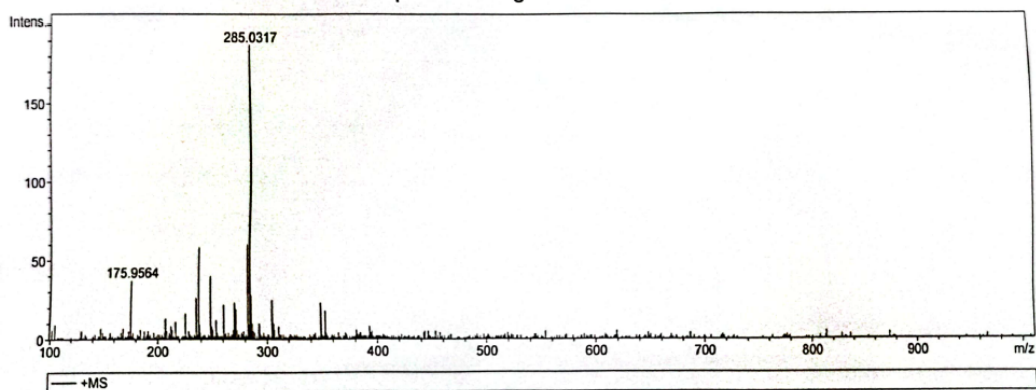

Figure S-8: HRMS of compound 4c

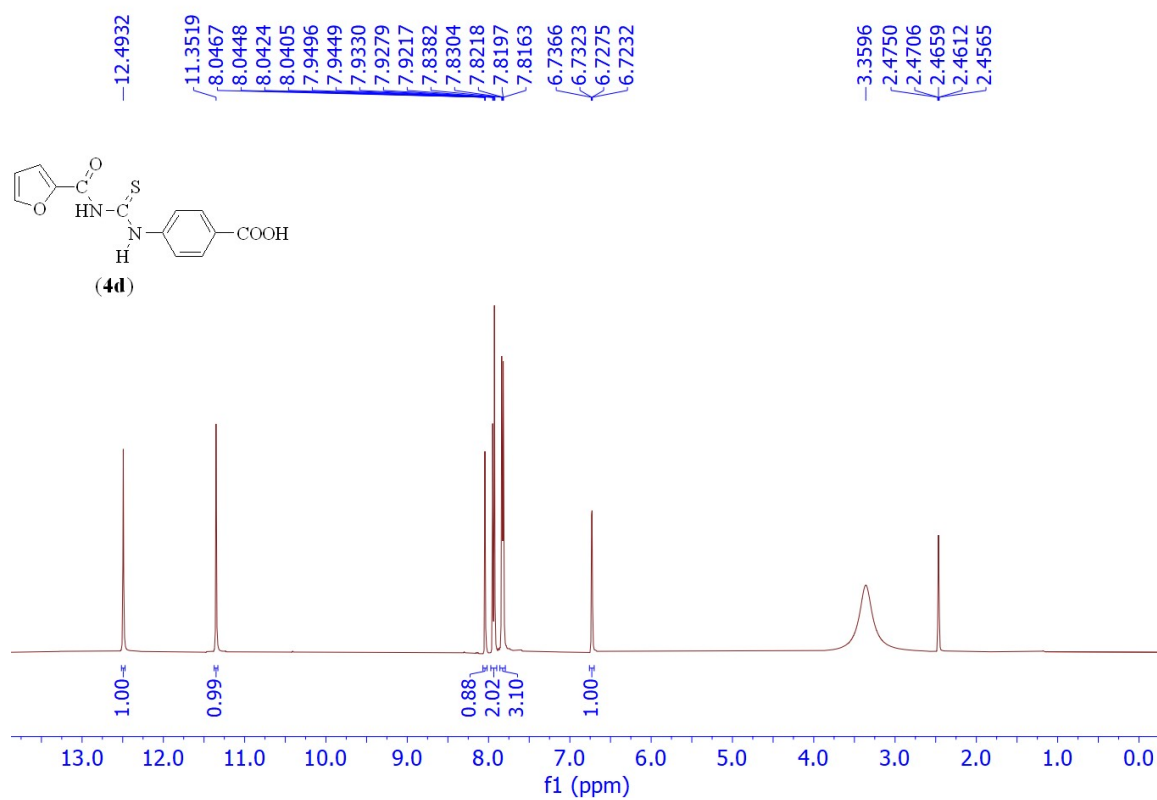

Figure S-9:  $^1\text{H}$  NMR (400 MHz) spectrum of compound **4d** in  $\text{DMSO}-d_6$

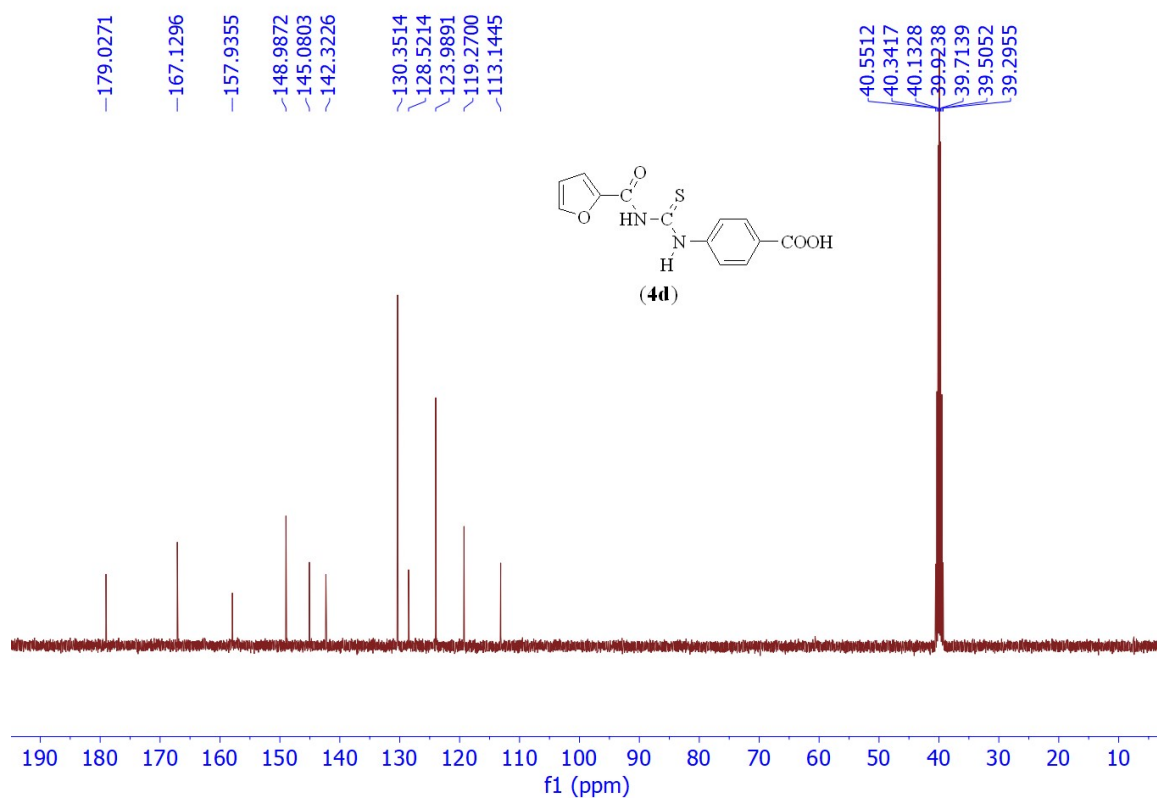

Figure S-10: <sup>13</sup>C NMR (100 MHz) spectrum of compound **4d** in DMSO-*d*<sub>6</sub>

Figure S-11: HRMS of compound **1**

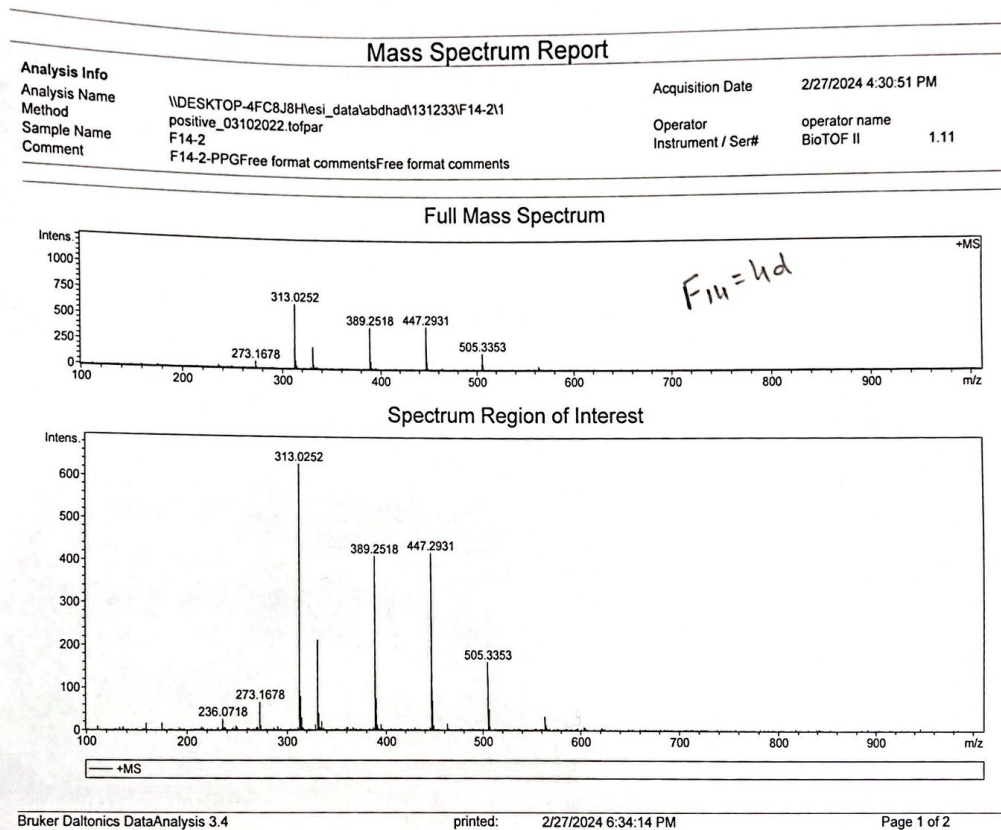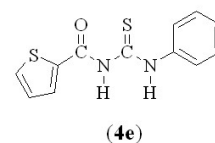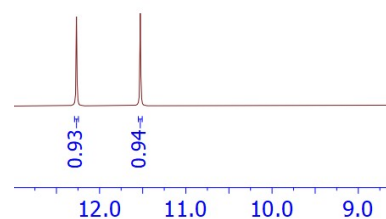

Figure S-12:  $^1\text{H}$  NMR (400 MHz) spectrum of compound **4e** in  $\text{DMSO}-d_6$

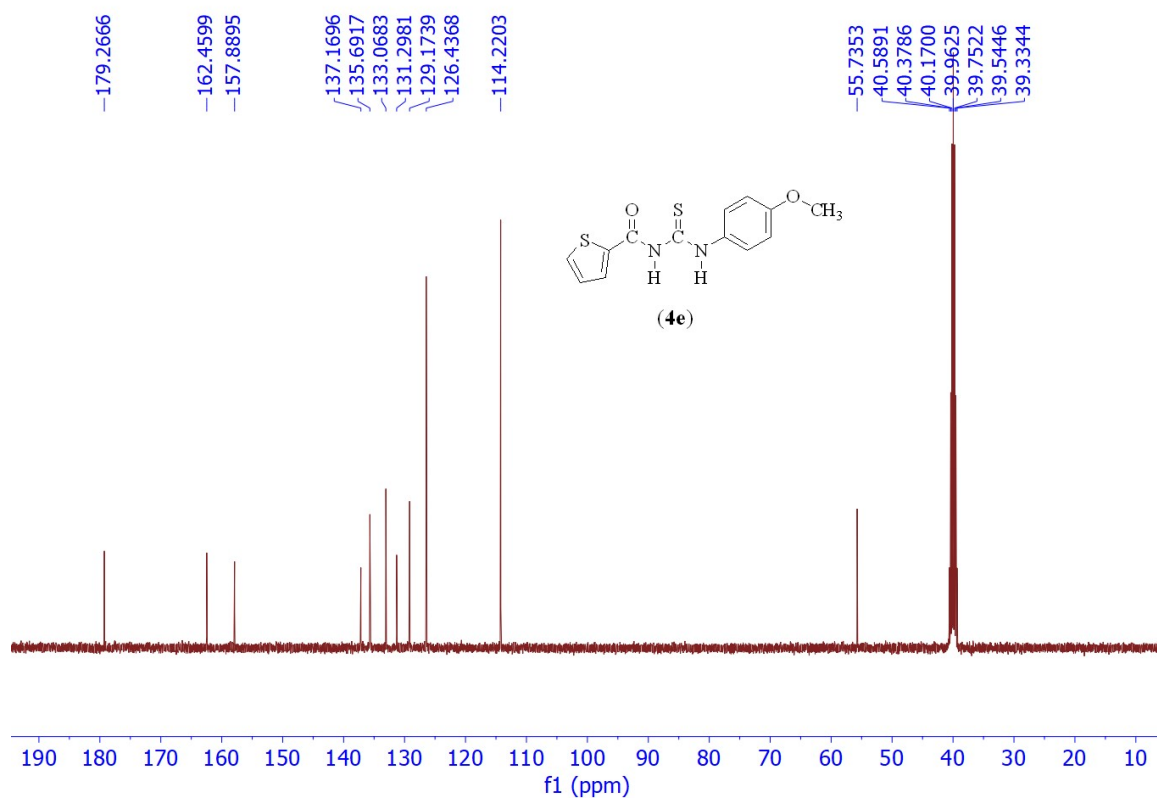

Figure S-13: <sup>13</sup>C NMR (100 MHz) spectrum of compound **4e** in DMSO-*d*<sub>6</sub>

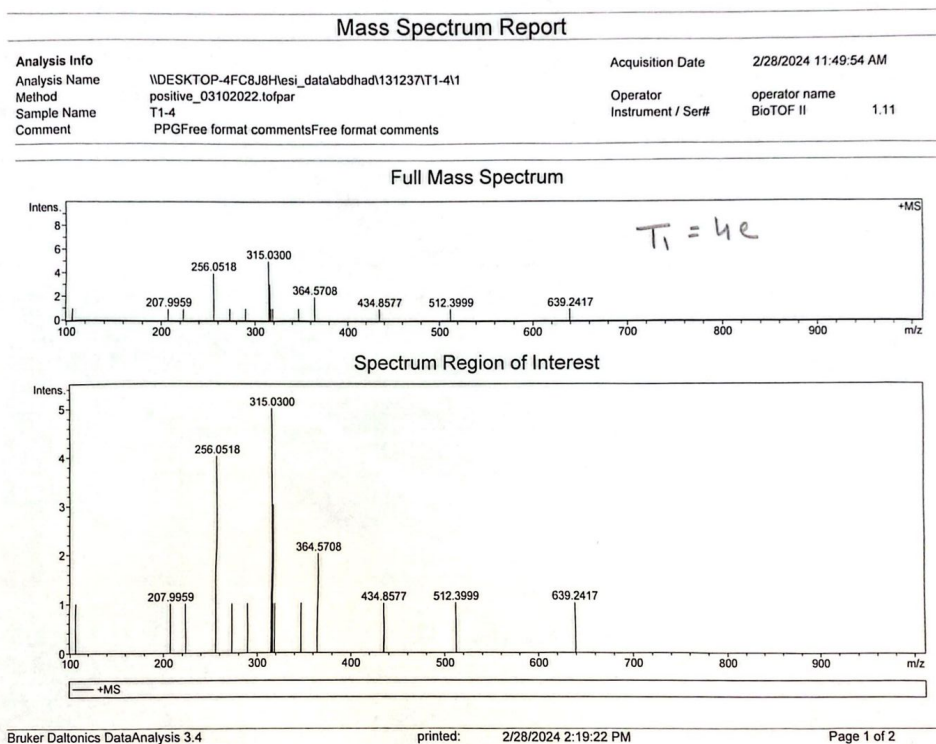

Figure S-14: HRMS of compound **4e**

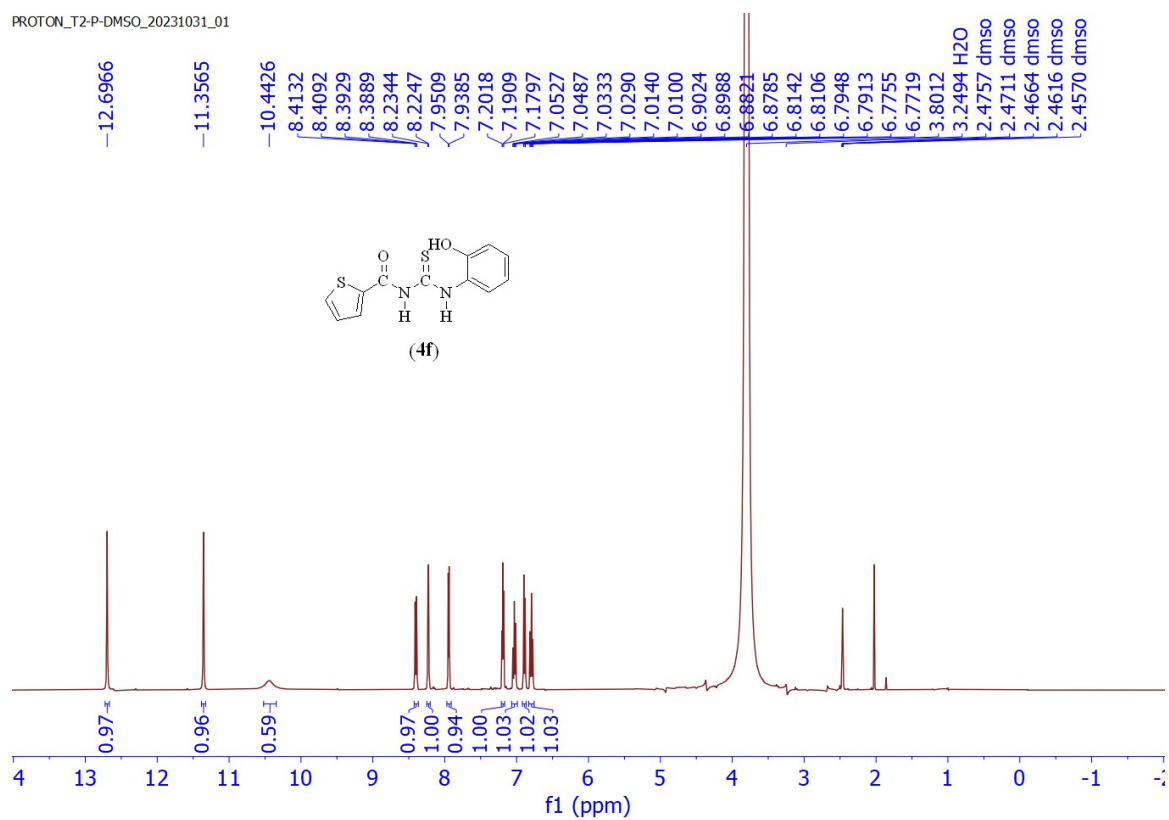

Figure S-15:  $^1\text{H}$  NMR (400 MHz) spectrum of compound **4f** in  $\text{DMSO}-d_6$

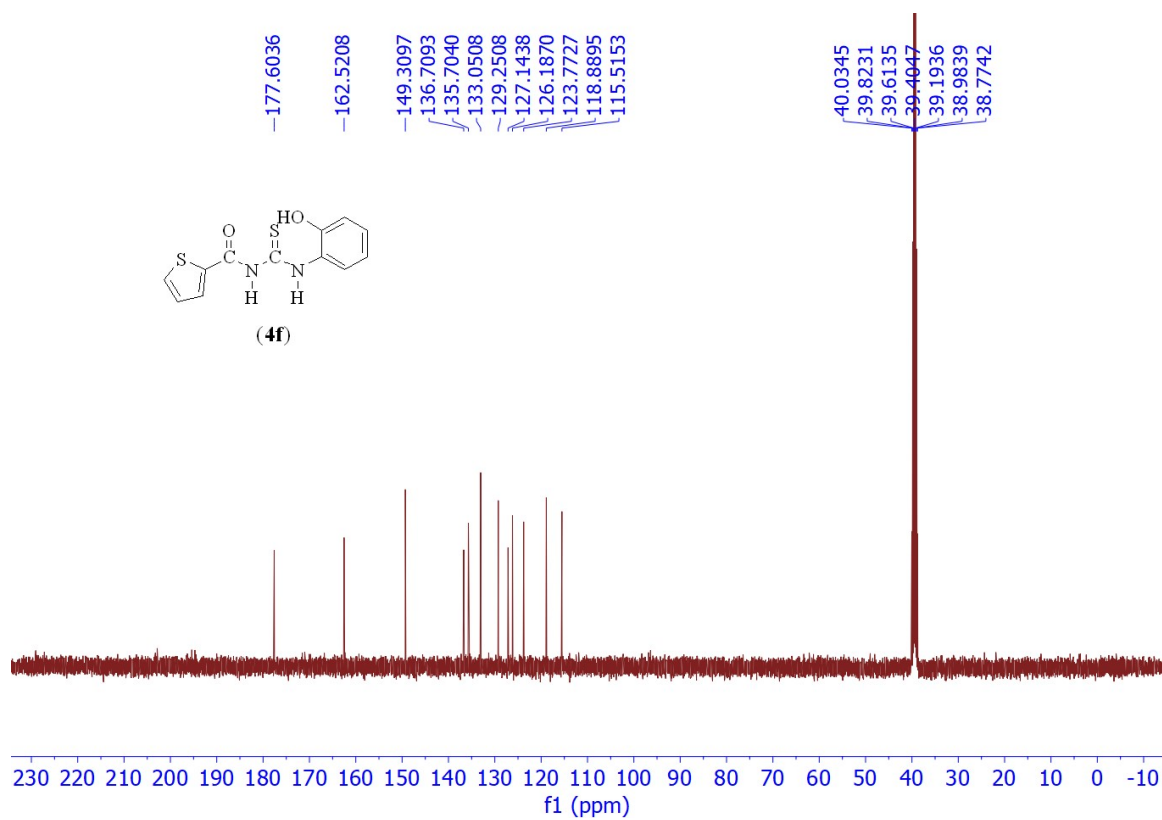

Figure S-16: <sup>13</sup>C NMR (100 MHz) spectrum of compound **4f** in DMSO-*d*<sub>6</sub>

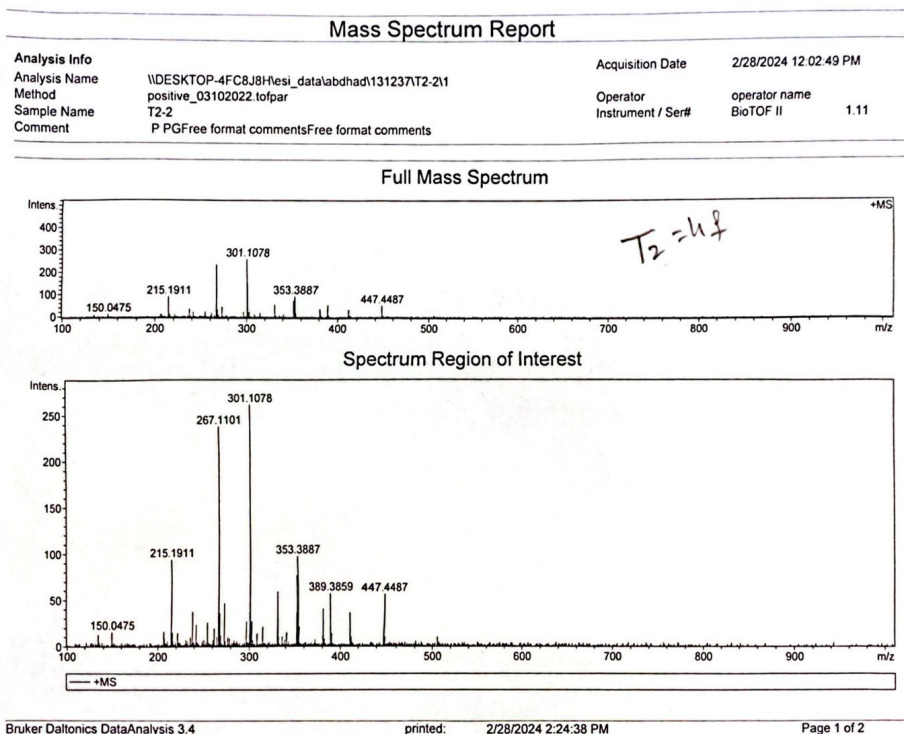

Figure S-17: HRMS of compound **4f**

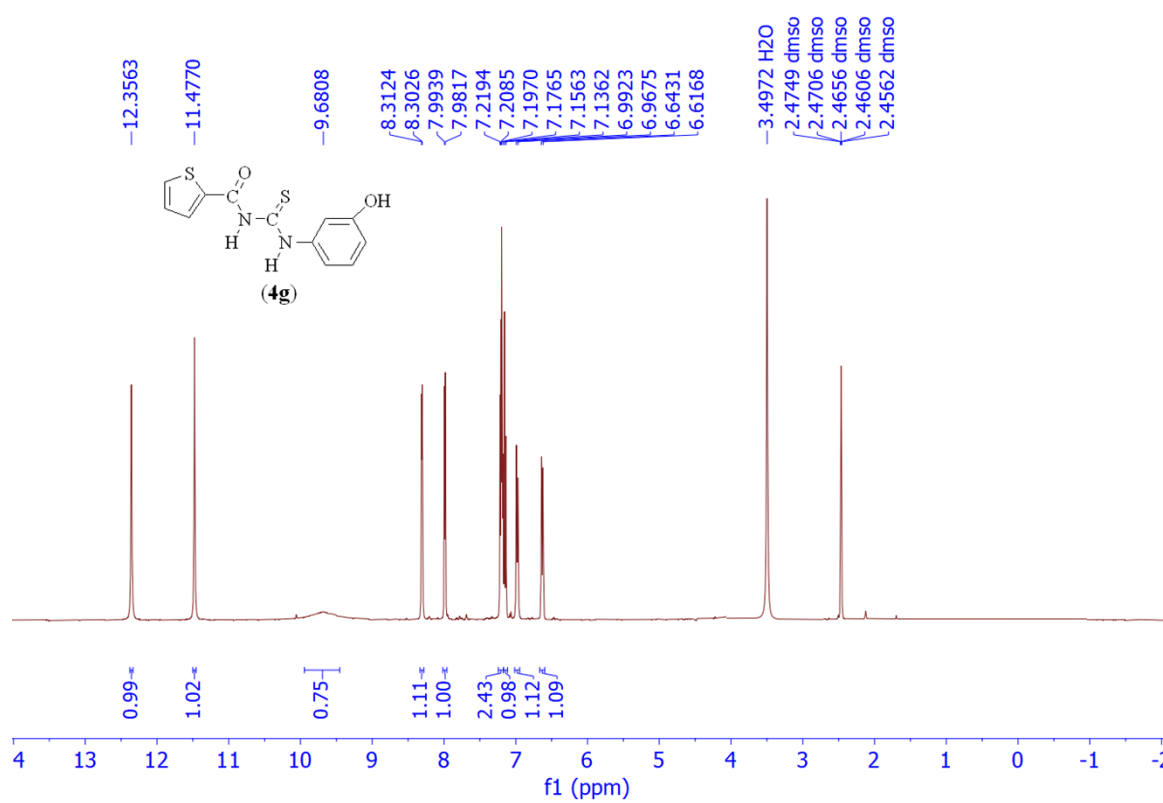

Figure S-18: <sup>1</sup>H NMR (400 MHz) spectrum of compound **4g** in DMSO-*d*<sub>6</sub>

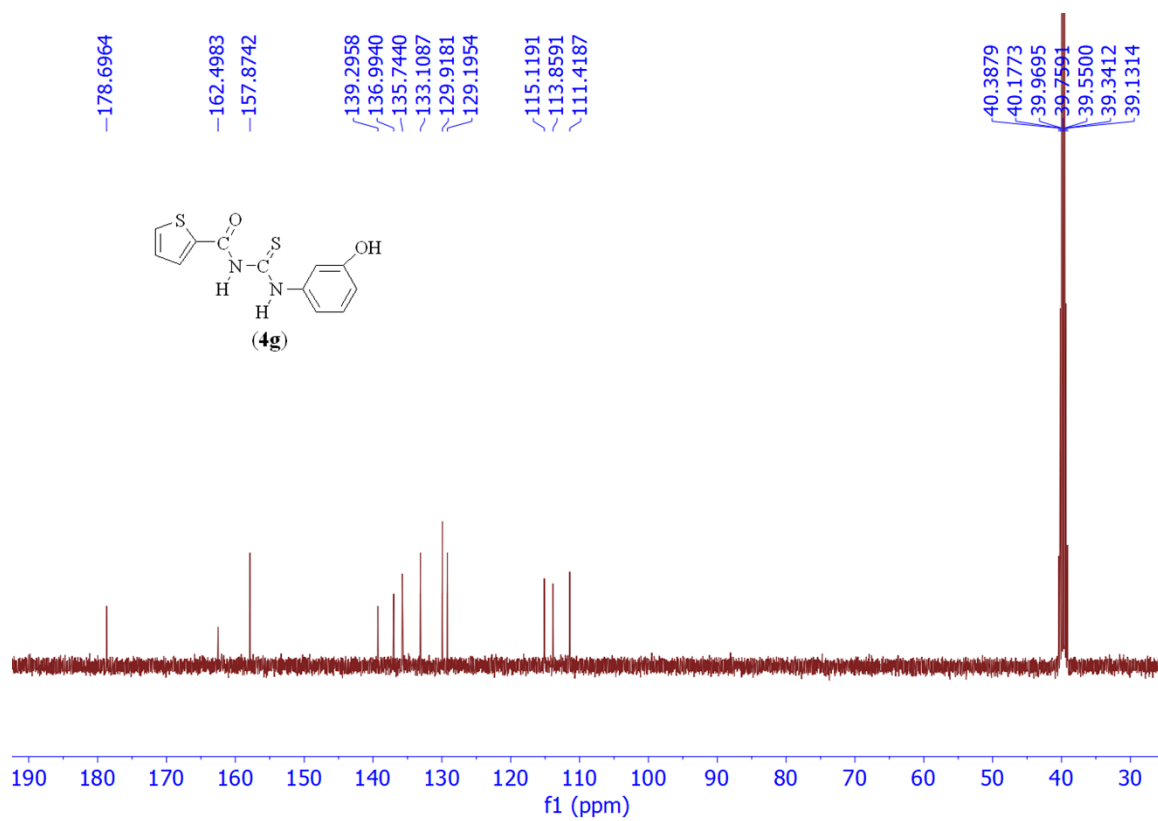

Figure S-19: <sup>13</sup>C NMR (100 MHz) spectrum of compound **4g** in DMSO-*d*<sub>6</sub>

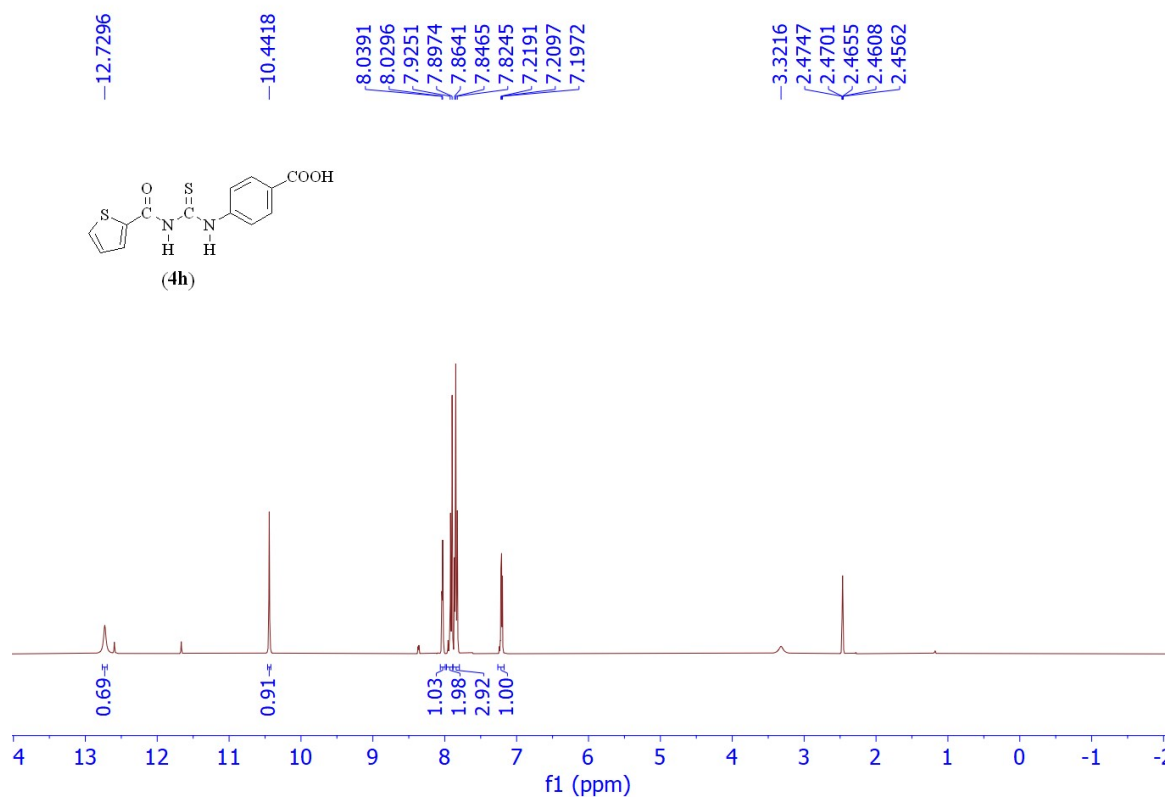

Figure S-20:  $^1\text{H}$  NMR (400 MHz) spectrum of compound **4h** in  $\text{DMSO}-d_6$

CARBON\_T8n-carbon\_20240119\_01 — —

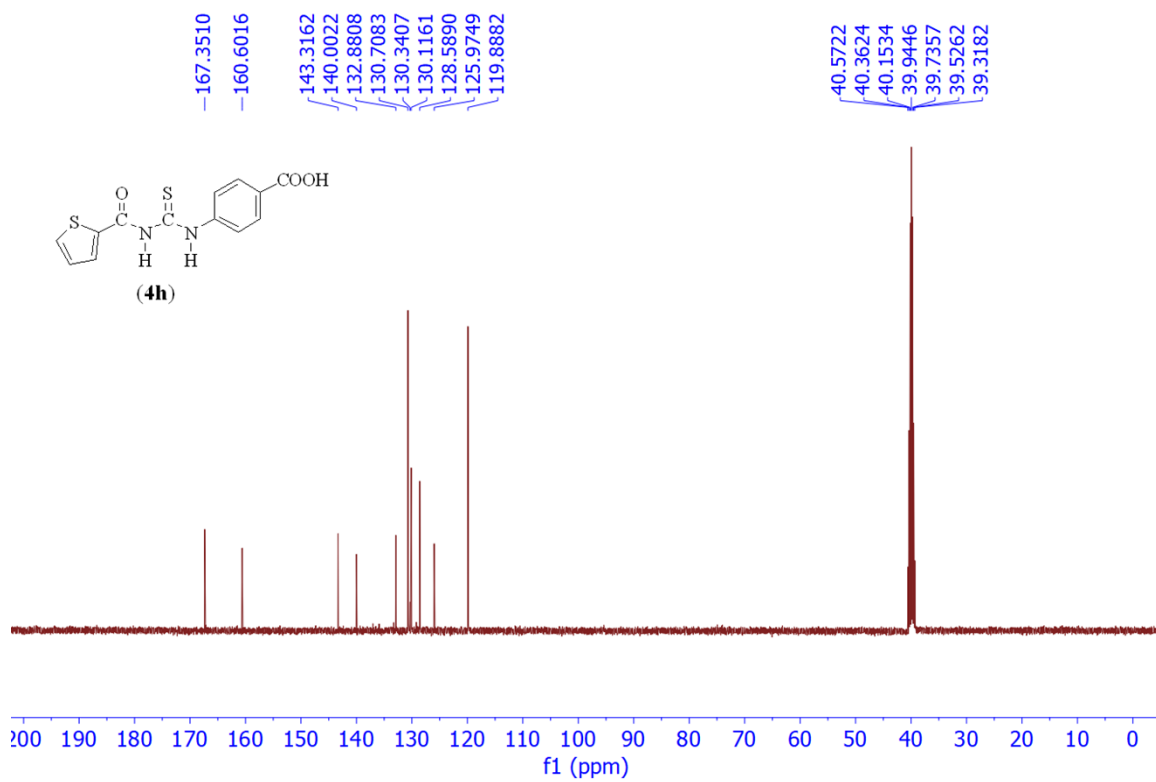

Figure S-21:  $^{13}\text{C}$  NMR (100 MHz) spectrum of compound **4h** in  $\text{DMSO-}d_6$

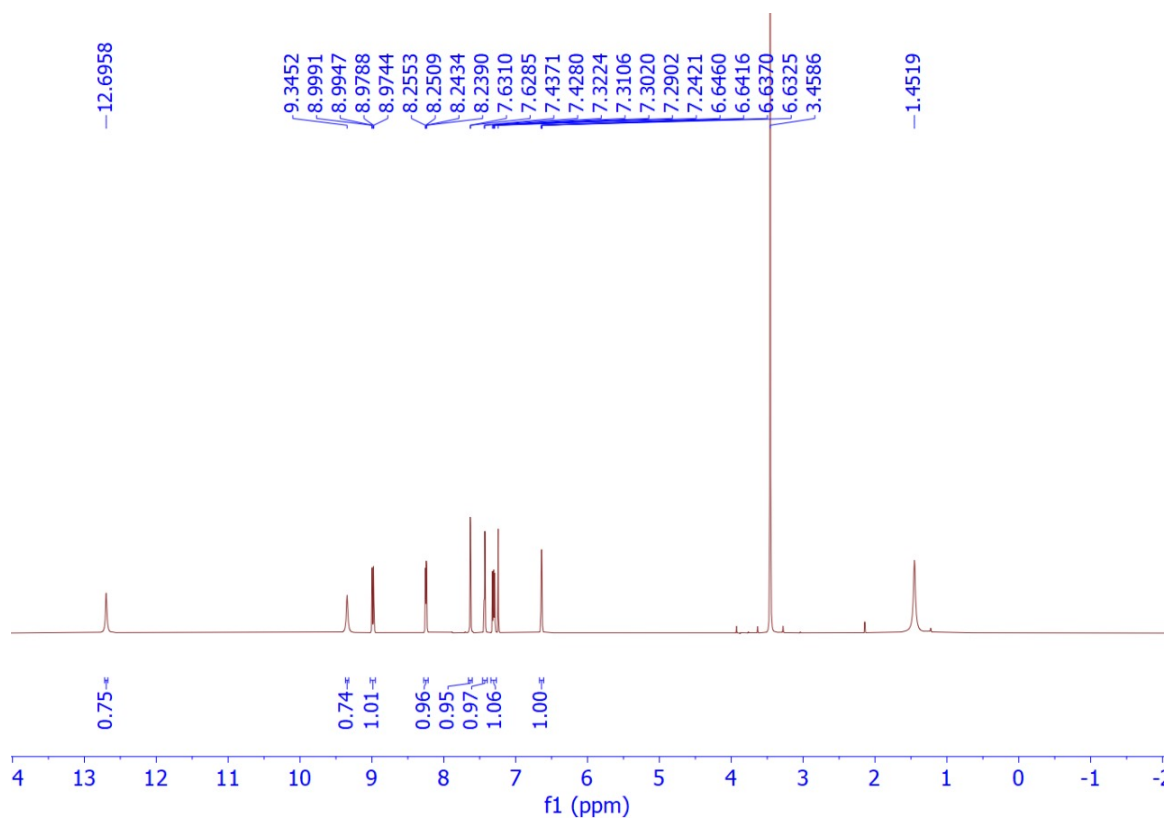

Figure S-22:  $^1\text{H}$  NMR (400 MHz) spectrum of compound **5a** in  $\text{CDCl}_3$

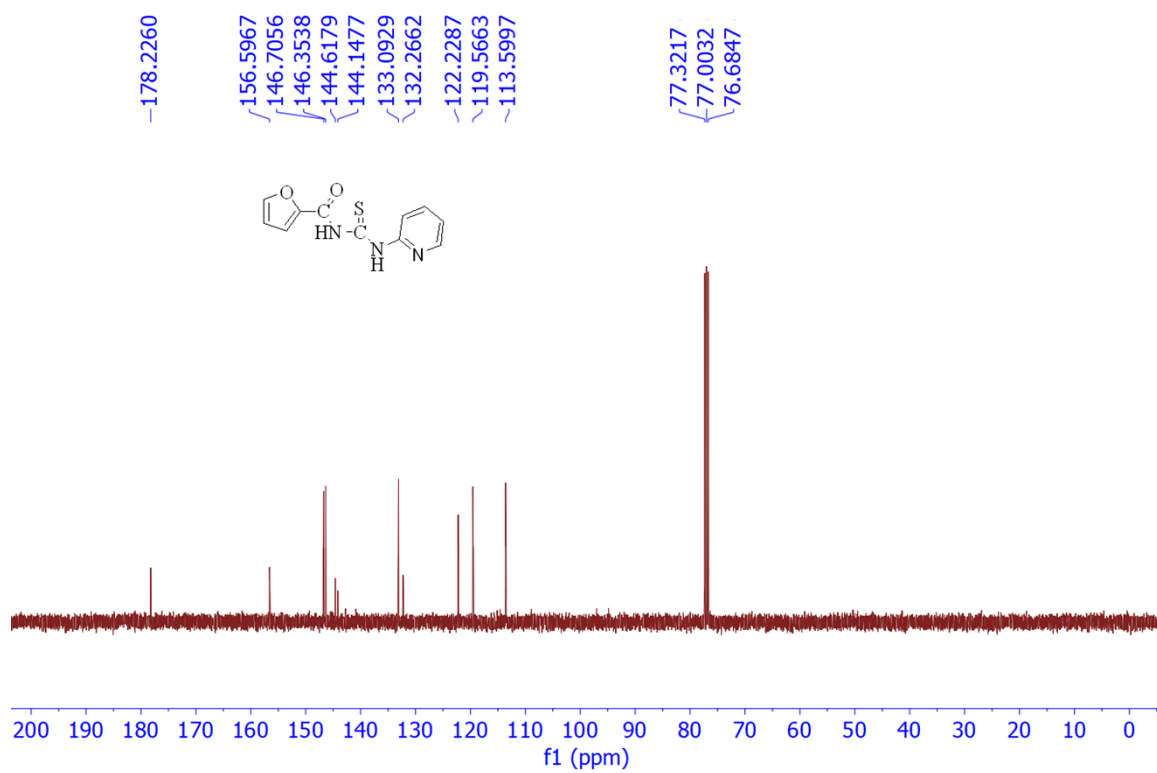

Figure S-23: <sup>13</sup>C NMR (100 MHz) spectrum of compound **5a** in CDCl<sub>3</sub>

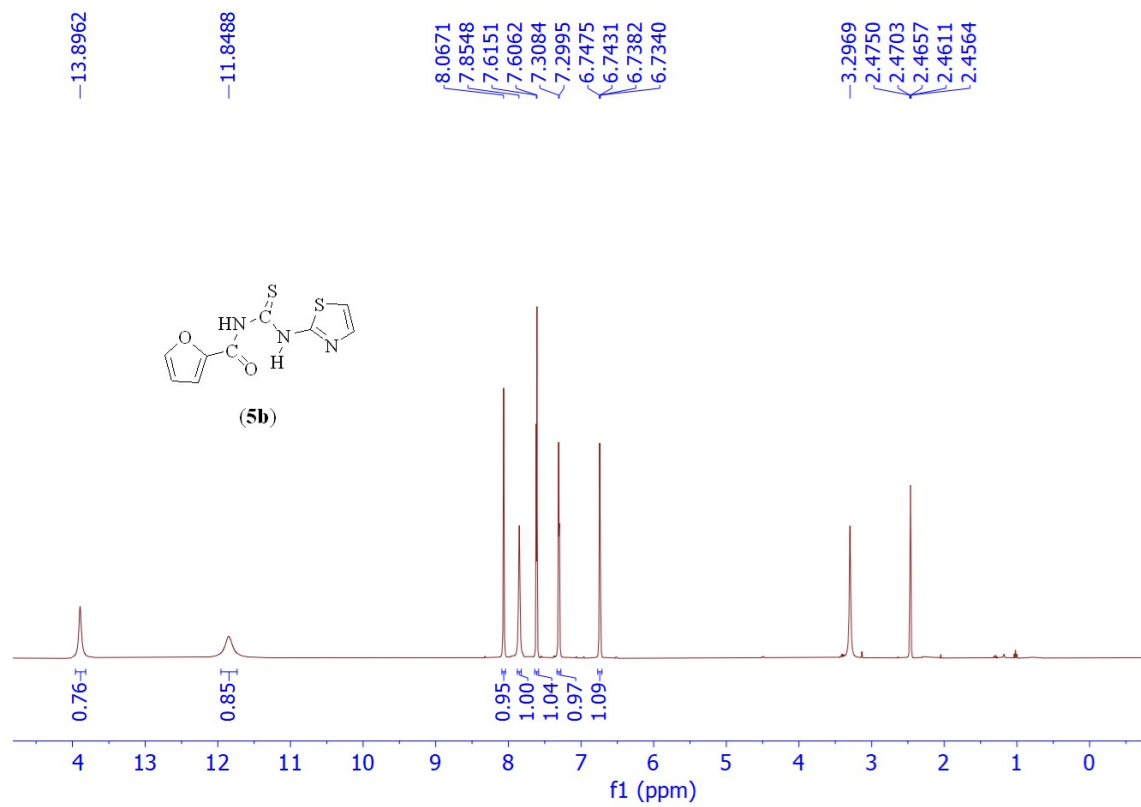

Figure S-24: <sup>1</sup>H NMR (400 MHz) spectrum of compound **5b** in DMSO-*d*<sub>6</sub>

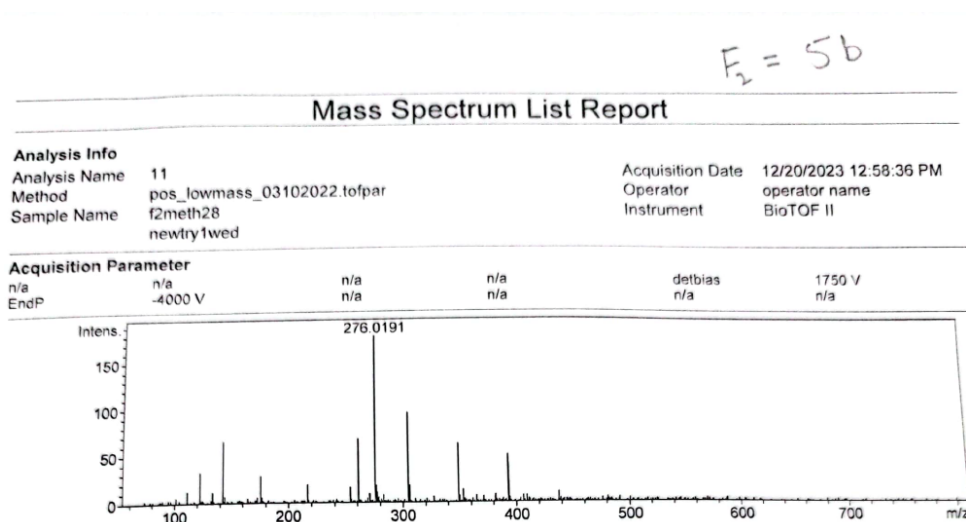

Figure S-25:  $^{13}\text{C}$  NMR (100 MHz) spectrum of compound **5b** in  $\text{DMSO}-d_6$

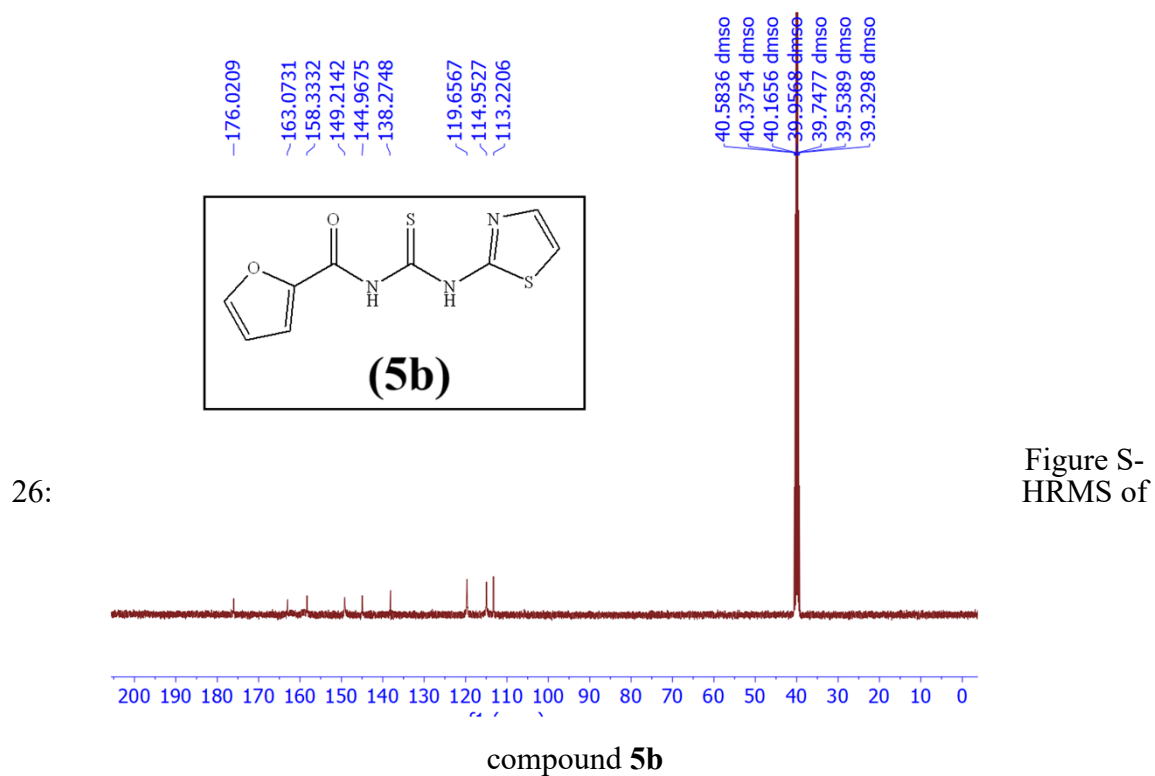

Figure S-  
HRMS of

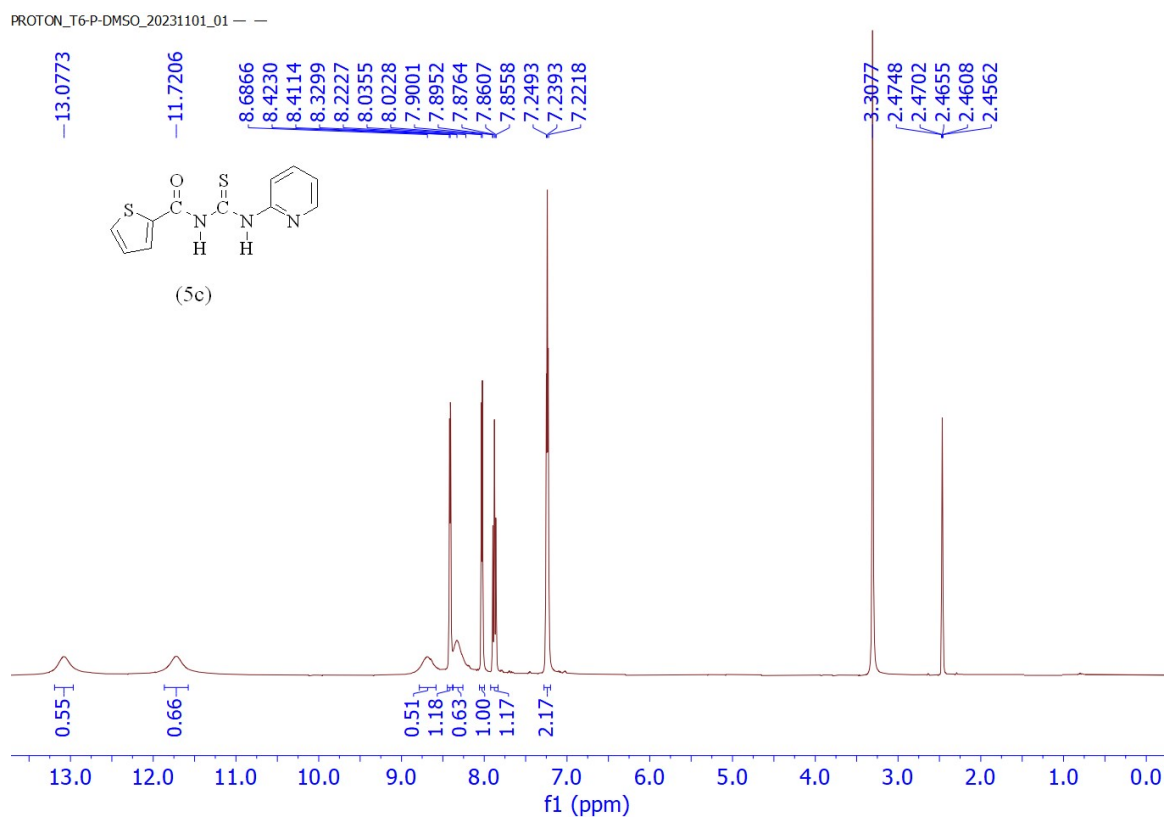

Figure S-27:  $^1\text{H}$  NMR (400 MHz) spectrum of compound **5c** in  $\text{DMSO-}d_6$

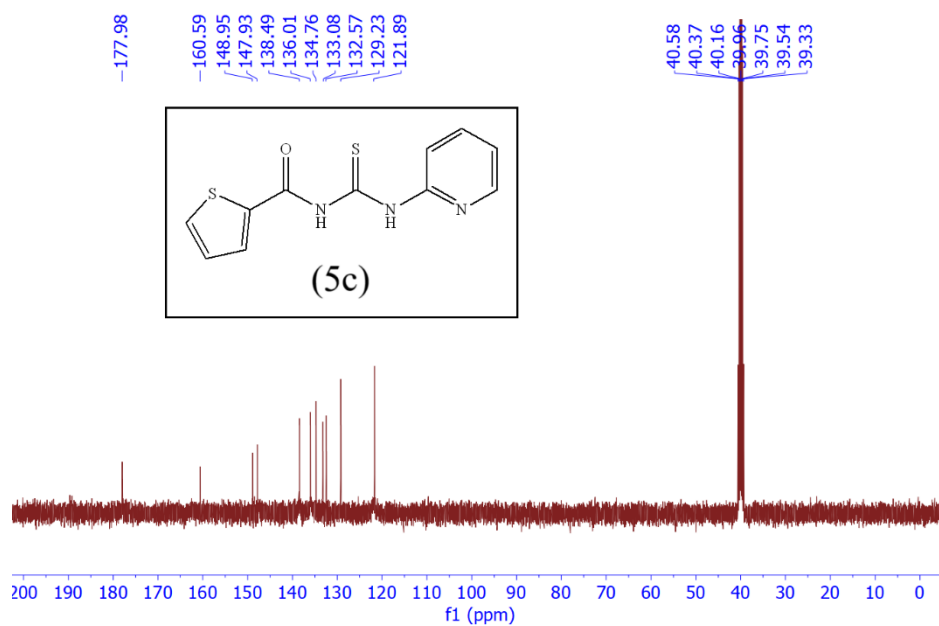

Figure  
(1001)  
O  
5c

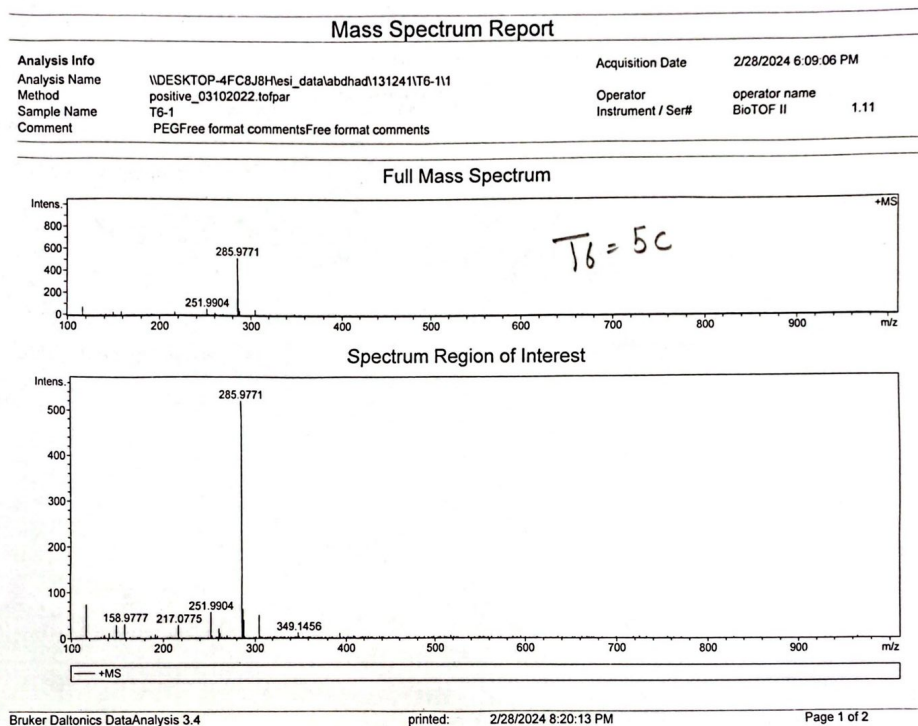

Figure S-29: HRMS of compound **5c**

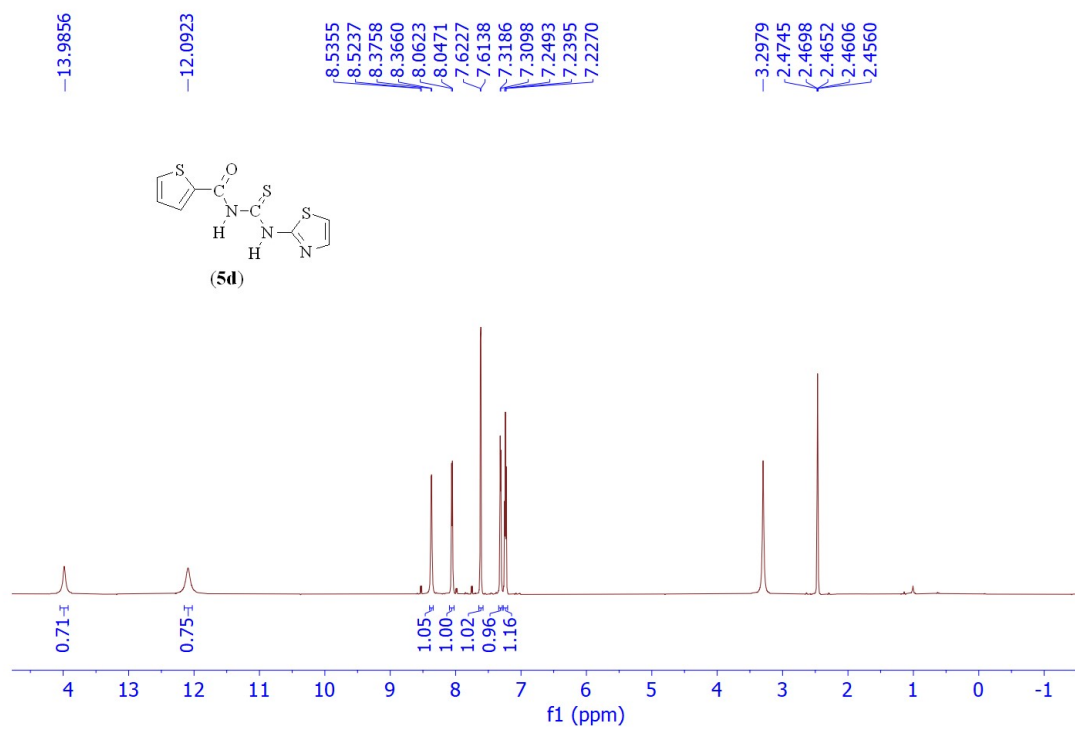

Figure S-30:  $^1\text{H}$  NMR (400 MHz) spectrum of compound **5d** in  $\text{DMSO}-d_6$

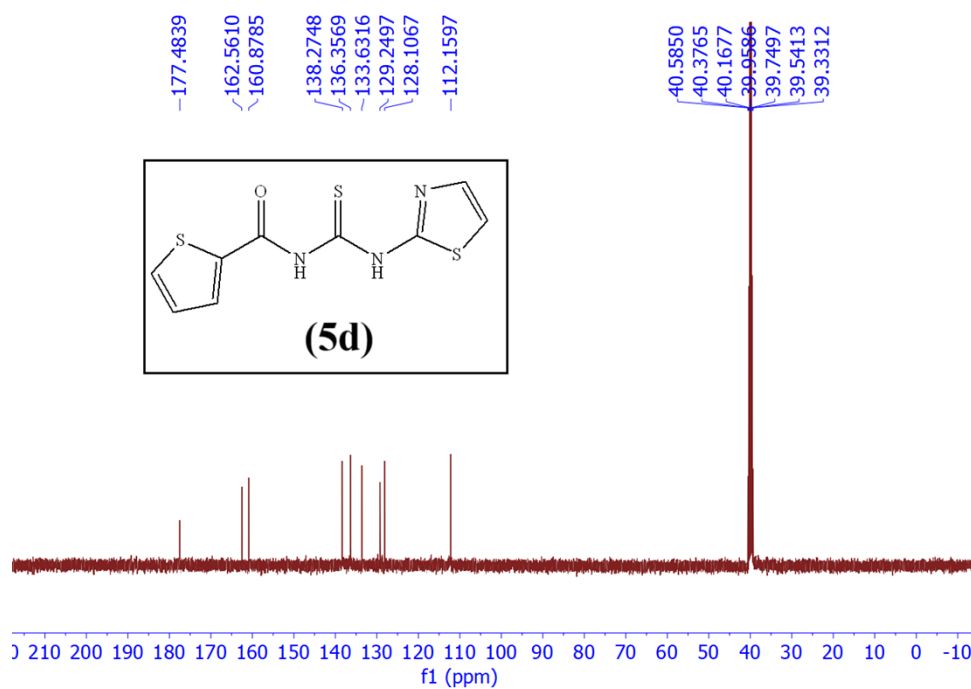

Figure  
NMR  
spect  
comp  
DMSO

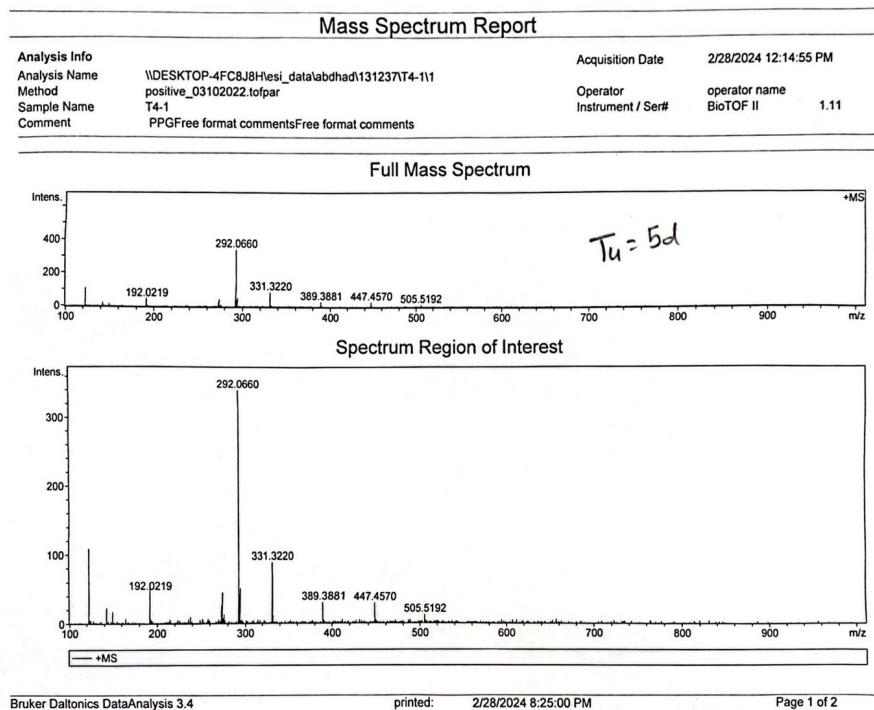

: <sup>13</sup>C  
(Hz)  
of  
d in

Figure S-32: HRMS of compound **5d**

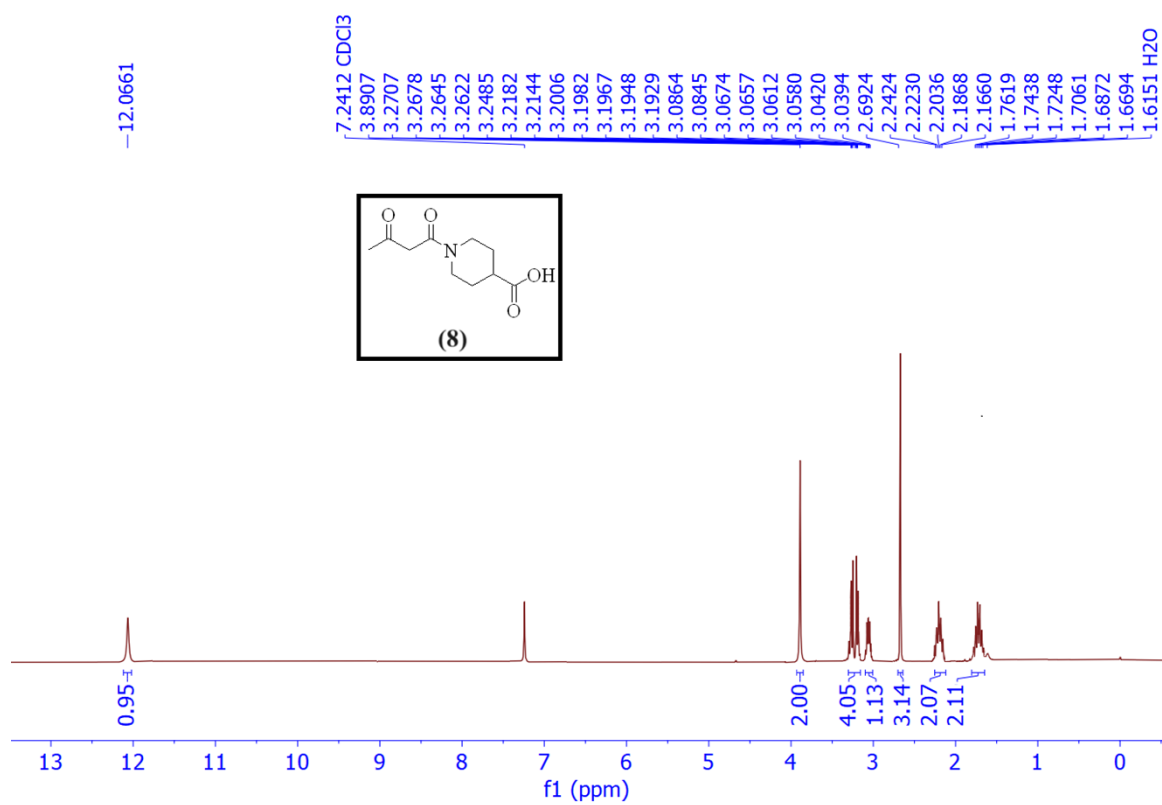

Figure S-33: <sup>1</sup>H NMR (400 MHz) spectrum of compound **8** in CDCl<sub>3</sub>

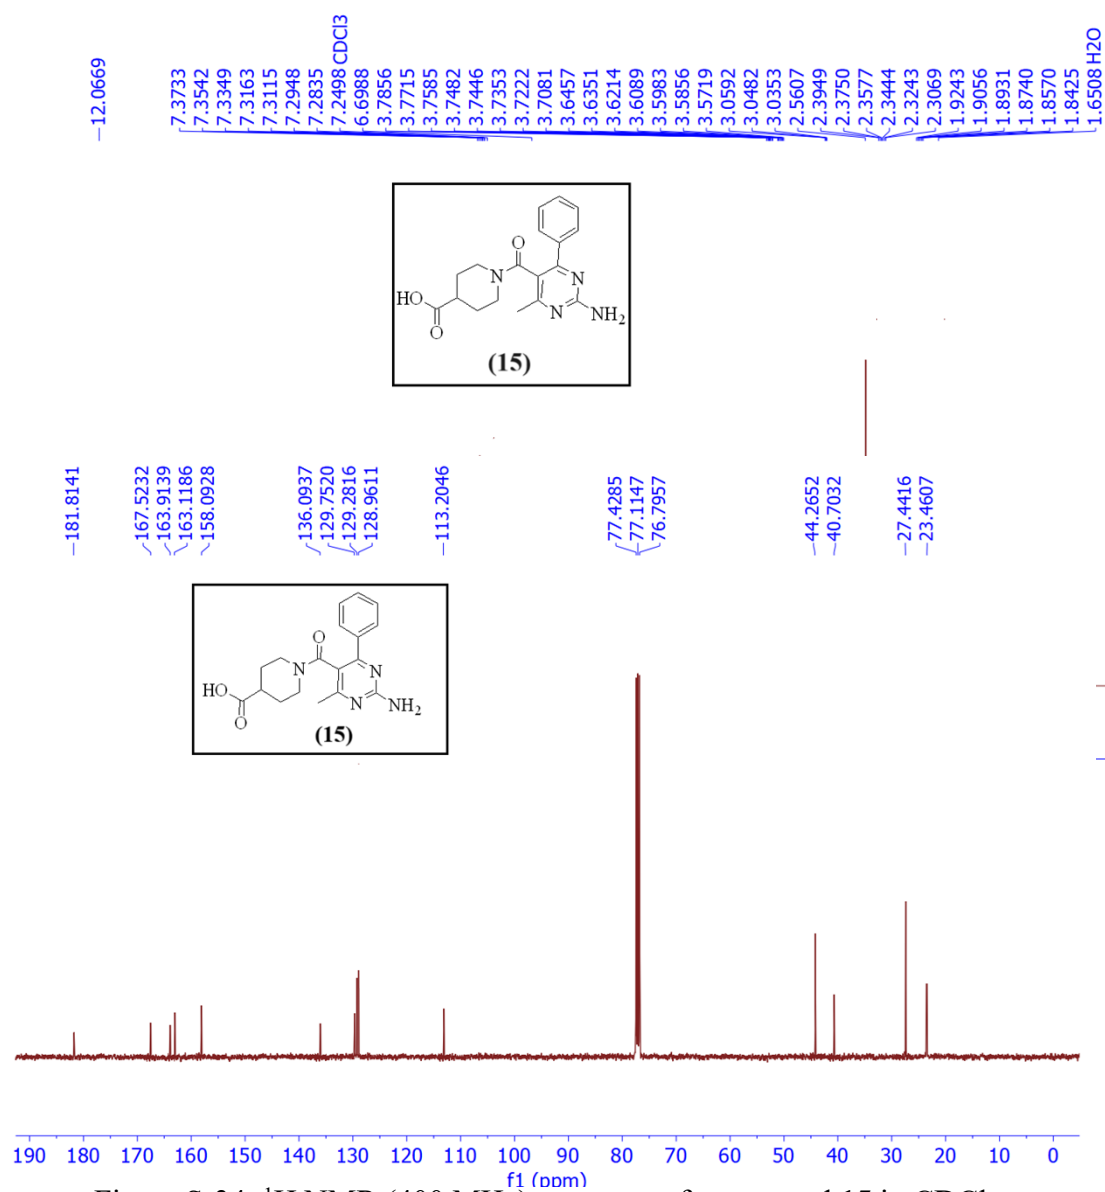

Figure S-34: <sup>1</sup>H NMR (400 MHz) spectrum of compound **15** in CDCl<sub>3</sub>

Figure S-35:  $^{13}\text{C}$  NMR (100 MHz) spectrum of compound **15** in  $\text{CDCl}_3$

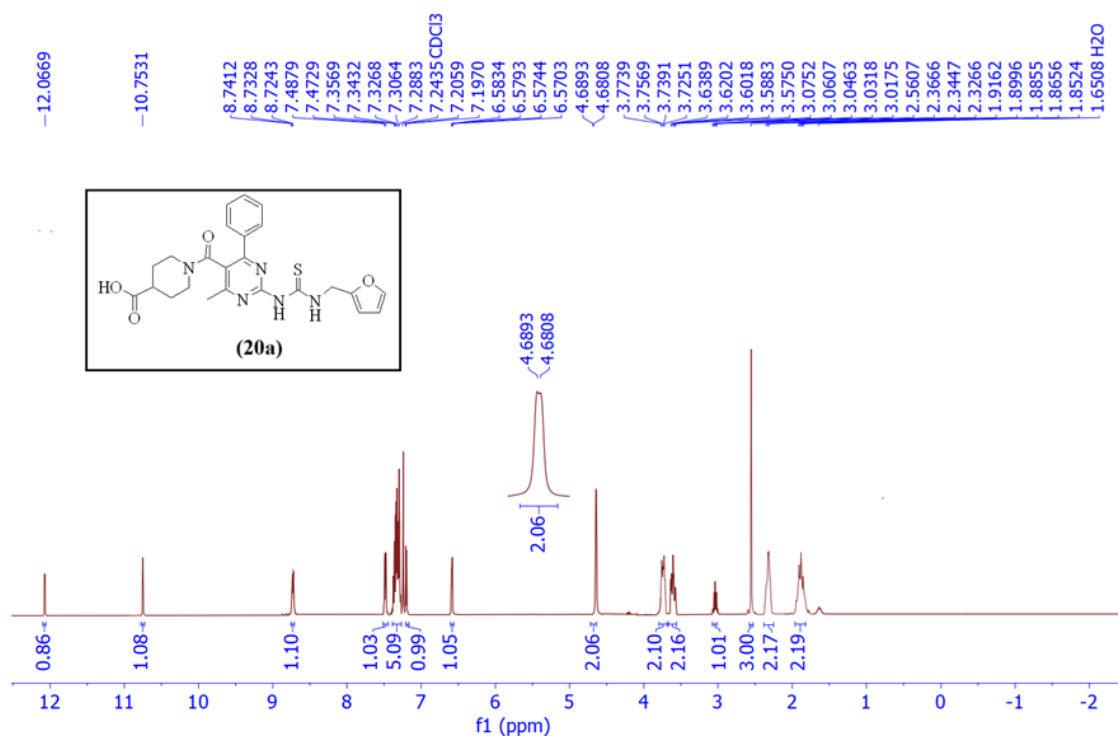

Figure S-36:  $^1\text{H}$  NMR (400 MHz) spectrum of compound **20a** in  $\text{CDCl}_3$

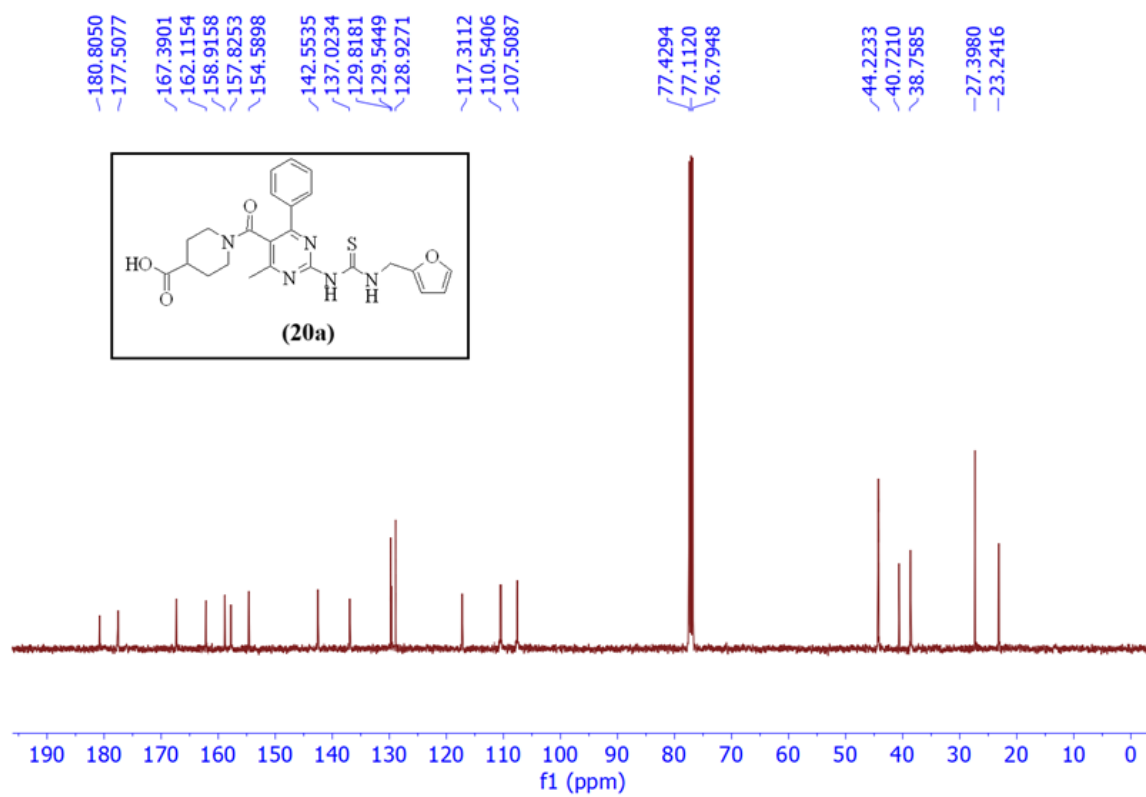

Figure S-37:  $^{13}\text{C}$  NMR (100 MHz) spectrum of compound **20a** in  $\text{CDCl}_3$

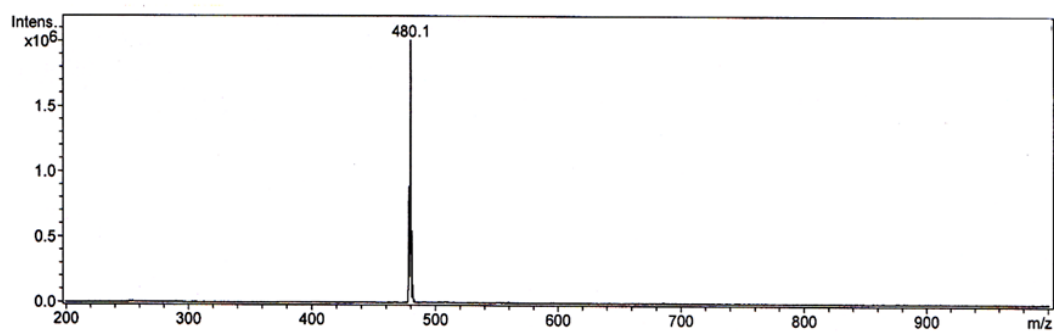

Figure S-38: LCMS Chromatogram of compound **20a**

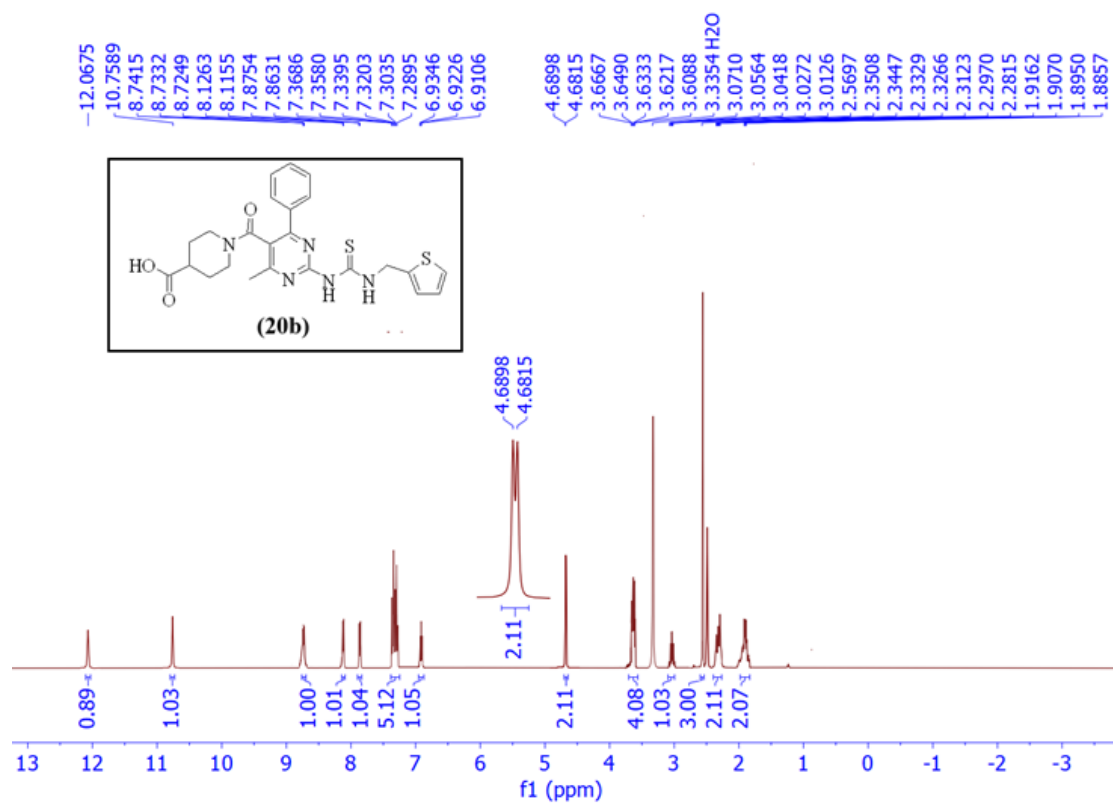

Figure S-39: <sup>1</sup>H NMR (400 MHz) spectrum of compound **20b** in DMSO-d<sub>6</sub>

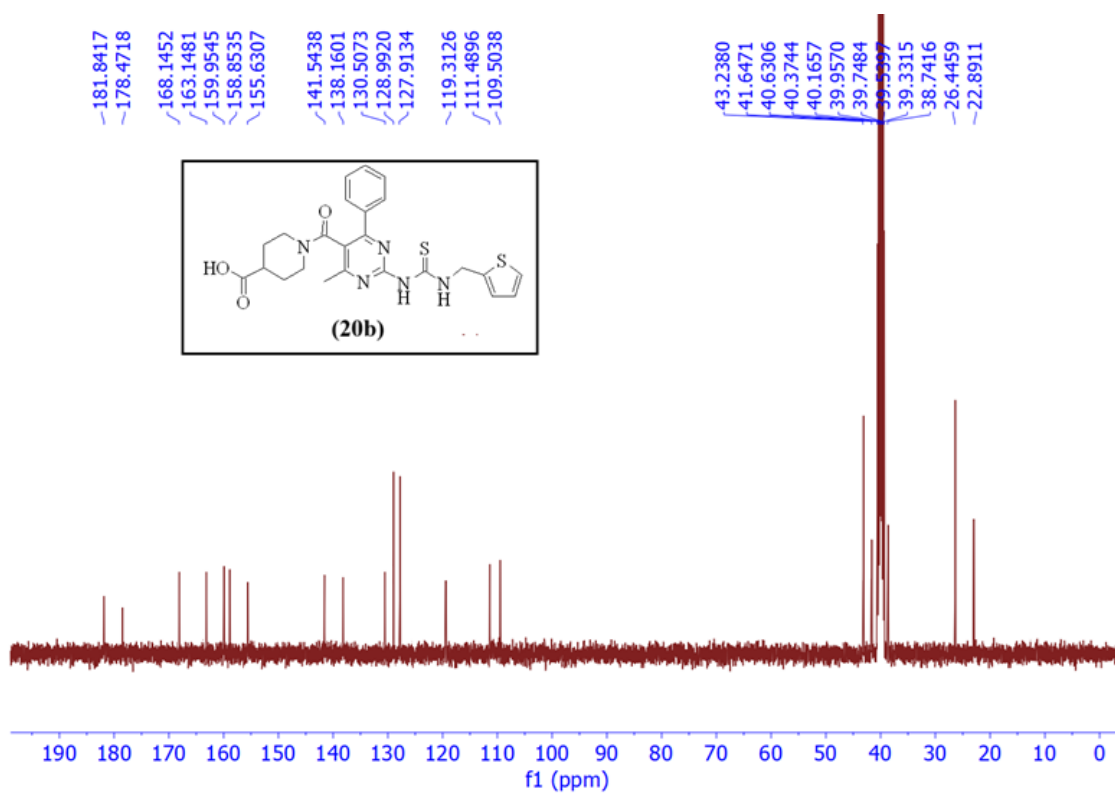

Figure S-40: <sup>13</sup>C NMR (100 MHz) spectrum of compound **20b** in DMSO-d<sub>6</sub>

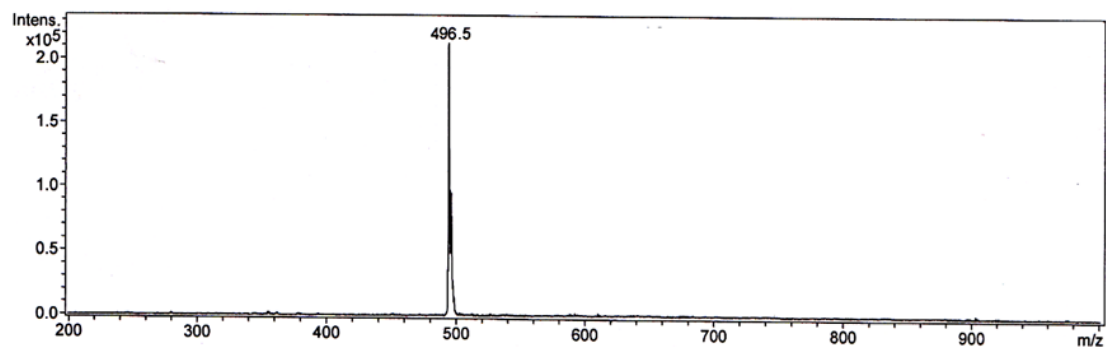

Figure S-41: LCMS Chromatogram of compound **20b**
